1 High titers of multiple antibody isotypes against the SARS-CoV-2 spike receptor-binding  
2 domain and nucleoprotein associate with better neutralization.

3  
4 Maria G. Noval<sup>1†</sup>, Maria E. Kaczmarek<sup>1†</sup>, Akiko Koide<sup>2,3†</sup>, Bruno A. Rodriguez-Rodriguez<sup>1†</sup>, Ping  
5 Louie<sup>4†</sup>, Takuya Tada<sup>1†</sup>, Takamitsu Hattori<sup>2,5</sup>, Tatyana Panchenko<sup>2</sup>, Larizbeth A. Romero<sup>5</sup>, Kai  
6 Wen Teng<sup>2</sup>, Andrew Bazley<sup>5</sup>, Maren de Vries<sup>1</sup>, Marie I. Samanovic<sup>6</sup>, Jeffrey N. Weiser<sup>1</sup>, Ioannis  
7 Aifantis<sup>2,4</sup>, Joan Cangiarella<sup>4</sup>, Mark J. Mulligan<sup>6</sup>, Ludovic Desvignes<sup>3,6,7</sup>, Meike Dittmann<sup>1</sup>,  
8 Nathaniel R. Landau<sup>1</sup>, Maria Agüero-Rosenfeld<sup>4</sup>, Shohei Koide<sup>2,5\*</sup>, and Kenneth A. Stapleford<sup>1\*</sup>

9  
10 <sup>1</sup>Department of Microbiology, NYU Grossman School of Medicine, New York, NY 10016

11 <sup>2</sup>Perlmutter Cancer Center, NYU Langone Health, New York, NY 10016

12 <sup>3</sup>Department of Medicine, NYU Grossman School of Medicine, New York, NY 10016

13 <sup>4</sup>Department of Pathology, NYU Grossman School of Medicine, New York, NY 10016

14 <sup>5</sup>Department of Biochemistry and Pharmacology, NYU Grossman School of Medicine, New York,  
15 NY 10016

16 <sup>6</sup>New York University Langone Vaccine Center and New York University Grossman School of  
17 Medicine, New York, NY 10016.

18 <sup>7</sup>Office of Science and Research, NYU Langone Health, New York, NY 10016

19

20 Running title: SARS-CoV-2 antibody response in healthcare workers.

21

22 †Contributed equally to this work.

23 \*Corresponding authors.

24 **Abstract**

25 Understanding antibody responses to SARS-CoV-2 is indispensable for the development of  
26 containment measures to overcome the current COVID-19 pandemic. Here, we determine the  
27 ability of sera from 101 recovered healthcare workers to neutralize both authentic SARS-CoV-2  
28 and SARS-CoV-2 pseudotyped virus and address their antibody titers against SARS-CoV-2  
29 nucleoprotein and spike receptor-binding domain. Interestingly, the majority of individuals have  
30 low neutralization capacity and only 6% of the healthcare workers showed high neutralizing titers  
31 against both authentic SARS-CoV-2 virus and the pseudotyped virus. We found the antibody  
32 response to SARS-CoV-2 infection generates antigen-specific isotypes as well as a diverse  
33 combination of antibody isotypes, with high titers of IgG, IgM and IgA against both antigens  
34 correlating with neutralization capacity. Importantly, we found that neutralization correlated with  
35 antibody titers as quantified by ELISA. This suggests that an ELISA assay can be used to  
36 determine seroneutralization potential. Altogether, our work provides a snapshot of the SARS-  
37 CoV-2 neutralizing antibody response in recovered healthcare workers and provides evidence that  
38 possessing multiple antibody isotypes may play an important role in SARS-CoV-2 neutralization.

39

40 **Keywords:** SARS-CoV-2, COVID-19, antibody, isotype, neutralization.

41

42

43

44

45

46

## 47 **Introduction**

48           The novel coronavirus, Severe Acute Respiratory Syndrome Coronavirus 2 (SARS-CoV-  
49 2), has rapidly spread across the globe, leading to Coronavirus Disease 2019 (COVID-19),  
50 devastating mortality, and significant impacts on our way of life. One question that still remains is  
51 whether those infected by SARS-CoV-2 generate an immune response that will protect them from  
52 reinfection<sup>1</sup>. Moreover, this question is particularly important for the development of a SARS-  
53 CoV-2 vaccine, as an effective vaccine would need to generate a potent neutralizing antibody  
54 response and immunological memory to provide long-lasting protection<sup>2,3</sup>. Thus, it is essential that  
55 we carefully study and document the neutralizing antibody responses in recovered individuals.

56           SARS-CoV-2 antibody testing is critical to understanding who has been infected and to  
57 provide a picture of seroprevalence in a community<sup>4-9</sup>. However, while these tests are important  
58 and provide a relative antibody titer, they are seen more as a “yes or no” type of answer to whether  
59 an individual has been infected. Importantly, these tests do not provide information on whether the  
60 SARS-CoV-2-specific antibodies present in serum are protective, including through virus  
61 neutralization, and as such, a positive antibody test may give individuals a false sense of  
62 “immunity” to the virus.

63           A number of studies have begun to unravel the antibody response to SARS-CoV-2 beyond  
64 a simple “yes or no” answer<sup>9-18</sup>. Here, we hypothesized that by examining the antibody profile in  
65 patient’s serum in terms of antigens, antibody isotypes (IgG, IgM, and IgA), and neutralization,  
66 we would be able to identify specific signatures associated to effective SARS-CoV-2  
67 neutralization. In this study, we obtained convalescent serum from 101 SARS-CoV-2 PCR-  
68 positive healthcare workers and performed a comprehensive analysis of neutralization of authentic  
69 SARS-CoV-2 and a pseudotyped lentivirus as well as serum IgG, IgM, and IgA antibody titers to

70 the SARS-CoV-2 spike receptor-binding domain (RBD) and the nucleoprotein (N) (**Fig. 1a**).  
71 Together, this study provides an in-depth look into the SARS-CoV-2 neutralizing antibody  
72 response in recovered individuals and highlights the role of multiple antibody isotypes in the  
73 development of a potent neutralizing antibody response.

74

## 75 **Methods**

76 **Serum samples.** Serum was collected from 101 healthcare workers from NYU Langone who had  
77 laboratory evidence of COVID-19 (PCR-positive) and were at least 21-28 days post symptoms or  
78 PCR test. Healthy control sera were collected from patients through the NYU Vaccine Center. All  
79 patients gave written consent and all samples were deidentified for this study under IRB #i20-  
80 00595 (SARS-CoV-2 infected) and IRB #s18-02037 (healthy controls).

81 **Plasmids** For pseudotyped virus generation: To construct the SARS-CoV-2  $\Delta$ 19 expression  
82 vector pcCOV2- $\Delta$ 19.S, a codon-optimized DNA sequence was synthesized encoding the SARS-  
83 CoV-2 Spike (Wuhan-Hu-1/2019). An amplicon was amplified encoding the S protein with a 19  
84 amino acid truncation of the cytoplasmic tail using primers containing flanking 5'-KpnI and 3'-  
85 XhoI sites and cloned into pcDNA6 (Invitrogen, Inc.). To construct the ACE2 expression vector  
86 pLenti.ACE2-HA, the ACE2 coding sequence was amplified from an ACE2 cDNA (Origene Inc)  
87 using primers with flanking 5'-XbaI and 3'-Sall sites and cloned into pLenti.CMV.GFP.puro. For  
88 RBD ELISA: The nucleotide sequence of the RBD of SARS-CoV-2 isolate Wuhan-Hu-1 (residues  
89 328-531) was obtained from a GenBank entry MN908947.3. A codon-optimized gene encoding  
90 the RBD with a hexa-histidine tag (His<sub>6</sub>-tag) and biotinylation tag (Avi-tag) at the C terminus was  
91 synthesized (Integrated DNA Technologies) and cloned into the pBCAG mammalian expression  
92 vector.

93 **Cells and virus.** Vero E6 cells (ATCC CRL-1586) were maintained in Dulbecco's Modified  
94 Eagle's Medium (DMEM, Corning) supplemented with 10% fetal bovine serum (FBS, Atlanta  
95 Biologics) and 1% nonessential amino acids (NEAA, Corning). Human embryonic kidney (HEK)  
96 293T cells were maintained in DMEM supplemented with 10% FBS, and 1%  
97 penicillin/streptomycin (P/S). To generate 293T stably expressing ACE2 (ACE2-293T cells),  
98 293T cells were transfected with pLenti.ACE2-HA DNA by lipofection with lipofectamine 2000  
99 (Invitrogen). After 2 days, the cells were selected in DMEM supplemented with 10% FBS, 1%  
100 P/S, and 1 µg/ml of puromycin. Single cell clones were expanded and analyzed by flow cytometry  
101 for ACE2 expression and a single clone was chosen for subsequent use. Expi293T cells (Thermo  
102 Fisher) were maintained in Expi293 Expression Medium (Thermo Fisher). All cells were  
103 maintained at 37°C with 5% CO<sub>2</sub> and confirmed mycoplasma free.

104 SARS-CoV-2, isolate USA-WA1/2020<sup>19</sup> (BEI resources # NR52281, a gift from Dr. Mark  
105 Mulligan at the NYU Langone Vaccine Center) was amplified once in Vero E6 cells (P1 from the  
106 original BEI stock). Briefly, 90-95% confluent T175 flask (Thomas Scientific) of Vero E6 (1x10<sup>7</sup>  
107 cells) was infected with 10 µL of the BEI stock in 3 mL of infection media (DMEM, 2% FBS, 1%  
108 NEAA, and 10 mM HEPES, pH 7.0) for 1 hour. After 1 hour, 15 ml of infection media was added  
109 to the inoculum and cells were incubated 72 hrs at 37 °C and 5% CO<sub>2</sub>. After 72 hrs, the supernatant  
110 was collected and the monolayer was frozen and thawed once. Both supernatant and cellular  
111 fractions were combined, centrifuged for 5 min at 1200 rpm, and filtered using a 0.22 µm Steriflip  
112 (Millipore). Viral titers were determined by plaque assay in Vero E6 cells. In brief, 220,000 Vero  
113 E6 cells/well were seeded in a 24 well plate, 24 hrs before infection. Ten-fold dilutions of the virus  
114 in DMEM were added to the Vero E6 monolayers for 1 hour at 37 °C. Following incubation, cells  
115 were overlaid with 0.8% agarose in DMEM containing 2% FBS and incubated at 37 °C for 72 hrs.

116 The cells were fixed with 10% formalin, the agarose plug removed, and plaques visualized by  
117 crystal violet staining. All experiments with authentic SARS-CoV-2 were conducted in the NYU  
118 Grossman School of Medicine ABSL3 facility.

119 **Pseudotyped virus preparation.** Pseudotyped virus was produced by calcium phosphate  
120 cotransfection of 293T cells with pMDL, plenti.GFP-NLuc, pcSARS-CoV-2-SΔ19 and pcRev at a  
121 ratio of 4:3:4:1. The supernatant was harvested 2 days post-transfection, passed through an 0.22  
122 μm filter and then pelleted by ultracentrifugation for 90 min at 30,000 rpm in an SW40.1 rotor.  
123 The pellet was resuspended in 1/10<sup>th</sup> the original volume of DMEM supplemented with 10% FBS  
124 and frozen at -80°C in aliquots.

125 **SARS-CoV-2 neutralization assay.** Vero E6 cells (30,400 cells/well) were seeded in a 96 well  
126 plate 24 hrs before infection so that a monolayer was present the following day. Serum samples  
127 from COVID-19 convalescent individuals and healthy donors were two-fold serially diluted  
128 (spanning from 1:10 to 1:10,240) in DMEM (Corning), 1% NEAA (Corning) and 10 mM HEPES  
129 (Gibco). Diluted serum samples were mixed 1:1 (vol/vol) with SARS-CoV-2 virus (6.8 x 10<sup>3</sup>  
130 PFU/ml), and incubated 1 h at 37 °C. During the incubation period, Vero E6 monolayers were  
131 washed once with DMEM (Corning) to remove any serum present in the media that could interfere  
132 with the assay. After incubation, 100 μl of the serum:SARS-CoV-2 mixtures were added to the  
133 Vero E6 monolayers, and cells were incubated at 37°C. Cells were monitored every day for  
134 cytopathic effects (CPE) induced by viral infection, and at 5 days post infection cells were fixed  
135 in 10% formalin solution (Fisher Scientific) for 1 hr. Cells were then stained by adding 50 μl  
136 crystal violet/well and incubated for 30 min. Each well was scored as “0” if there was no monolayer  
137 left, “0.5” if there was some monolayer and the well was clearly infected, or “1” if the monolayer  
138 was intact. The minimum inhibitory concentration (MIC) was defined as the minimal serum

139 dilution in which the cell monolayer was intact (score = 1). Each serum sample was measured in  
140 technical duplicates.

141 **Pseudotype virus neutralization assay.** To determine neutralizing serum titers, ACE2-293T cells  
142 were plated in 96 well tissue culture dishes at 10,000 cells/well. The following day, 2-fold dilutions  
143 of the donor sera were made in culture medium spanning a range from 1:10 to 1:10240. Each  
144 dilution (50  $\mu$ l) was mixed with 5  $\mu$ l SARS-CoV-2 S $\Delta$ 19 lentiviral pseudotype. The mixtures were  
145 incubated for 30 min at room temperature and then added to the plated ACE-2 293T cells. The  
146 plates were cultured for two days at 37°C with 5% CO<sub>2</sub> after which the supernatant was removed  
147 and replaced with 50  $\mu$ l Nano-Glo Luciferase Substrate (Promega, Inc.). Light emission was  
148 measured in an Envision 2103 Multi-label plate reader (PerkinElmer, Inc.).

149 **SARS-CoV-2 Nucleoprotein ELISA.** Serum IgG, IgA, and IgM antibodies to the SARS-CoV-2  
150 nucleoprotein were tested using the SARS-CoV-2 IgG, IgA and IgM ELISA kits manufactured by  
151 Virotech Diagnostics GmbH for Gold Standard Diagnostics (Davis, CA) following the  
152 manufacturer's instructions. For the detection of IgG and IgA, serum samples were diluted 1:100  
153 in dilution buffer and for IgM, serum samples were diluted 1:101 in RF-Adsorption dilution buffer  
154 mixture and incubated at room temperature for 15 min before being added to the wells. Results are  
155 reported qualitatively as negative (<9.0 units), equivocal (9.0-11.0 units), and positive (>11.0  
156 units).

157 **SARS-CoV-2 spike receptor-binding domain (RBD) purification and ELISA.** The Expi293F  
158 cells (Thermo Fisher) were transiently transfected with the expression vector using the  
159 ExpiFectamine™ 293 Transfection Kit (Thermo Fisher, A14524) and the Expi293 Expression  
160 Medium (Thermo Fisher, A14351). The transfected cells were cultured at 37 °C with 8% CO<sub>2</sub> for  
161 7 days. The culture supernatant was harvested by centrifugation, supplemented with protease

162 inhibitors and clarified by further centrifugation at 8,000 rpm for 20 min and filtration through a  
163 0.22  $\mu$ m filter. The supernatants were dialyzed into 20 mM sodium phosphate pH 7.4 with 500  
164 mM sodium chloride and the recombinant RBD was purified by immobilized metal ion affinity  
165 chromatography (IMAC) using a HisTrap excel column (GE Healthcare). The purified protein was  
166 biotinylated using the *E. coli* BirA enzyme produced in house in the presence of 10 mM ATP and  
167 0.5 mM biotin. The RBD protein was purified by IMAC and dialyzed against PBS and stored at -  
168 80 °C. High purity of the purified protein was confirmed using SDS-PAGE, and analysis by size  
169 exclusion chromatography using a Superdex 75 10/300 Increase column (GE Healthcare), which  
170 showed a single, monodisperse peak consistent with its molecular mass (**Extended Data Fig. 1A**  
171 **and B**).

172 For the ELISA, the wells of 384-well ELISA plates (NUNC Maxisort cat# 464718) were  
173 coated with 15  $\mu$ l of 4  $\mu$ g/ml neutravidin (ThermoFisher cat # 31000) for one hour at room  
174 temperature (R.T.) in a humidified chamber. The wells were washed with 100  $\mu$ l PBST (PBS  
175 containing 0.1 % Tween 20) (ThermoFisher, cat# BP337-500) three times using a BioTek 405TS  
176 plate washer housed in a BSL-2 biosafety cabinet. The wells were blocked with 0.5 % BSA  
177 (Gemini Bio cat# 700-100P, skim milk was not used for blocking because milk can contain biotin  
178 that would inhibit antigen immobilization) in PBS overnight at 4 °C. After removing the blocking  
179 buffer, 15  $\mu$ l of 20 nM RBD-His<sub>6</sub>-Avi-biotin in PBS was added to each well using a Mantis  
180 dispenser (Formulatrix). The plates were incubated at R.T. in a humidified chamber for 20 min,  
181 and the wells were washed with 100  $\mu$ l PBST three times using the plate washer. The wells were  
182 further blocked with 15  $\mu$ l of 10  $\mu$ M biotin in 3% skim milk in PBST (Sigma, cat# 1.15363.0500)  
183 for ten min at R.T. in order to block unsaturated neutravidin.



184 Serum samples were heat-treated at 56°C for one hour<sup>9</sup> and diluted 158-fold in 1% skim  
185 milk in PBST and placed in a 96-well polypropylene plate (ThermoFisher, cat # AB-0796), which  
186 served as a master plate. The following sample handling was performed using a Hudson SOLO  
187 liquid handler housed in a BSL-2 biosafety cabinet. Twelve microliters of diluted serum were  
188 transferred per well of an RBD-immobilized 384-well plate after removing the biotin solution. To  
189 prepare 500-fold diluted samples, 8.22 µl of the diluent (1 % skim milk in PBST) was first  
190 dispensed into a well to which 3.78 µl of diluted serum from the master plate was added. After 2  
191 hours of incubation at R.T., the plate was washed with PBST three times using the plate washer.  
192 15 µl of secondary antibody (anti human Fab-HRP: Jackson ImmunoResearch, cat# 109-035-097;  
193 anti human IgG-HRP: Sigma, cat# A6029-1ML; anti human IgM-HRP: Jackson ImmunoResearch,  
194 cat# 109-035-129; and anti-human IgA-HRP: Jackson ImmunoResearch, cat# 109-035-011;  
195 x1/5000 diluted in 1 % milk in PBST) was added using the Mantis dispenser and incubated for one  
196 hour at R.T. After washing the plate with PBST three times and then with PBS three times, 25 µl  
197 of the substrate (SIGMAFAST™ OPD; Sigma P9187-50SET) was added into the wells using the  
198 Mantis dispenser. Subsequently, the stop solution (25 µl of 2 M HCl) was added using the Mantis  
199 dispenser. The dispenser was programmed in such a way that the reaction in each well was stopped  
200 after 10 min. Absorbance at 490 nm was measured using a BioTek Epoch 2 plate reader. All  
201 samples were analyzed two independent times to identify outliers. Those yielding inconsistent  
202 results in both assays were excluded from analysis (Sample 76 and 86, **Extended Data Table 1**).  
203 Thresholds were determined comparing the 101 SARS-CoV-2 PCR positive samples at two  
204 dilutions 1/158 and 1/500 and compared with 43 SARS-CoV-2 PCR negative individuals. The  
205 cutoff values were defined as the mean plus three times the standard deviation (SD) of the negative

206 control samples. Results were reported as positive if the values are  $> 1.091$  for IgG,  $> 0.256$  for  
207 IgA and  $> 0.694$  for IgM (**Extended Data Fig. 1C**).

208 **Data analysis and statistics.** All experiments were performed in technical duplicates and data  
209 analysis and statistics were performed using GraphPad Prism (Version 8.4.3), R Studio (Version  
210 1.2.5001), and R (Version 3.6.3).

211 **Data availability.** Data that supports all figures, extended data, and analysis is found in Extended  
212 Data Table 1.

213

214

215

216

217

218

219

220

221

222

223

224

225

226

227

228

229 **Results**

230 **SARS-CoV-2 seroneutralization capacity is low in the majority of individuals.**

231 To better understand the human SARS-CoV-2 neutralizing antibody response in  
232 convalescent patients, we obtained serum from 101 COVID-19-recovered New York City  
233 healthcare workers who had experienced symptoms and had tested positive (by PCR testing) for  
234 SARS-CoV-2 in March 2020 (**Fig. 1a** and **Extended Data Table 1**). To begin, we assessed how  
235 well each individual's serum was able to neutralize both authentic SARS-CoV-2 (isolate USA  
236 WA01/2020), and a lentiviral pseudotyped virus bearing the SARS-CoV-2 Spike protein  
237 (pseudotyped virus) *in vitro*. Pseudotyped viruses are a safe alternative to authentic virus assays<sup>20</sup>,  
238 and can therefore be employed by a greater number of research institutes and clinical laboratories  
239 to assess neutralization of convalescent serum. However, several studies have shown differences  
240 in sensitivity between neutralization of authentic SARS-CoV-2 and specific pseudotyped  
241 viruses<sup>21,22</sup>. Thus, we set out to determine serum neutralization capacity using both our in-house  
242 lentiviral pseudotyped virus and the WA01/2020 strain of SARS-CoV-2.

243 For the neutralization assays performed with authentic SARS-CoV-2 virus we determined  
244 the minimum inhibitory concentration (MIC), calculated as the minimum serum dilution at which  
245 serum is fully-protective (**Extended Data Table 1**). For the neutralization experiments performed  
246 with the pseudotyped virus, we used a reporter pseudotyped virus expressing luciferase which  
247 allows for the calculation of the IC<sub>90</sub> and the midpoint transition (IC<sub>50</sub>) (**Extended Data Fig. 2** and  
248 **Extended Data Table 1**). Using these systems, we found that neutralization of the authentic  
249 SARS-CoV-2 and the pseudotyped virus was positively correlated (**Fig. 1b**,  $R^2 = 0.49$ ,  $p < 0.0001$ ).  
250 Moreover, the SARS-CoV-2 neutralizing antibody response could be broken into three categories  
251 (**Fig. 1c**). Using  $1/\text{MIC}$  and  $1/\text{IC}_{90}$  we find the majority of infected individuals (~75%) had a low

252 neutralization capacity, roughly 20% of individuals had intermediate neutralization and only a  
253 select few (~5-6%) had high neutralization of the authentic virus. When comparing pseudotyped  
254 virus to authentic SARS-CoV-2 virus neutralization, there was no significant difference in the  
255 proportion of individuals assigned as low or intermediate (**Fig. 1c**). In contrast, there is a significant  
256 difference between the percentage of individuals deemed high neutralizers using authentic SARS-  
257 CoV-2 versus pseudotyped virus (**Fig. 1c and d, p=0.02**). These results validate the use of the  
258 pseudotyped virus as an efficient alternative to determine the neutralizing potential of serum. But  
259 they also suggests that authentic SARS-CoV-2 virus may be better able to detect potent  
260 neutralizing serums, which has implications for the selection of donors for passive immunization  
261 therapy.

262 Finally, because samples were collected from individuals at varying times post onset of  
263 symptoms, it may be expected that the proportion of highly or moderately neutralizing sera would  
264 decrease over time. However, we found that there was no particular pattern in this cohort.  
265 Individuals with low, medium, and high neutralizing sera determined using authentic SARS-CoV-  
266 2 are found between 32 and 57 days (**Fig. 1e**). Together, these results show that at the time points  
267 we analyzed (32-57 days post symptom onset), serum SARS-CoV-2 neutralizing antibody capacity  
268 is low in most recovered individuals.

### 269 **Human SARS-CoV-2 infection generates antigen-specific, multi-isotype antibody response.**

270 Given the broad neutralization capacity observed in this cohort, we were interested in  
271 examining the antibody profile of each individual. It is not uncommon that antibody responses are  
272 skewed toward one or a few viral proteins<sup>10,23</sup>. If this is the case, using a single antigen may result  
273 in a biased test that inadequately detects antibodies produced by convalescent individuals. Thus,  
274 we quantified serum antibody IgG, IgA, and IgM titers by ELISA, focusing on antibodies

275 generated to two SARS-CoV-2 antigens (**Extended Data Table 1**). First, we used the Gold  
276 Standard ELISA assay currently deployed at the Tisch Hospital Clinical Labs in New York City  
277 which uses the nucleoprotein (N). Second, we developed an in-house ELISA for the SARS-CoV-  
278 2 Spike receptor-binding domain (RBD) (**Extended Data Fig. 1**). If antibody titers against Spike  
279 RBD and N correlate, this suggests that individuals mount a uniform response to both these  
280 antigens. A lack of correlation suggests that individuals mount a skewed response toward one of  
281 these antigens preferentially.

282         When we compared the isotype responses to anti-RBD and anti-N directly, we found that  
283 IgG correlated the strongest ( $R^2 = 0.51$ ) followed by IgA ( $R^2 = 0.23$ ) and IgM ( $R^2 = 0.21$ ) (**Fig.**  
284 **2a-c, left panels**). The percentage of IgG and IgM positive individuals, as detected by reactivity  
285 against RBD or N, was similar (**Fig. 2a and b, right panels**). Strikingly, the majority of individuals  
286 with positive titers of IgA to the Spike RBD were largely IgA-negative for N (**Fig. 2c, left panel**).  
287 This translated to a significant difference in IgA detection between the Gold Standard test and our  
288 in-house ELISA (**Fig. 2c, right panel**,  $p = 2 \times 10^{-16}$ ), and suggests that the IgA response is largely  
289 skewed towards the Spike RBD in comparison to N (**Fig. 2c**). It is possible that days post symptom  
290 onset plays a role in both serum antibody titers and the relative percentage of IgG, IgM and IgA  
291 positive people. Within our cohort we observed no relationship between time post symptom onset  
292 and antigen-specific antibody isotype titers (**Extended Data Fig. 3**), even finding IgM present at  
293 50 days post infection (**Extended Data Fig. 3B**). Together these results suggest that the antibody  
294 isotype response to SARS-CoV-2 may be antigen-specific, with IgA skewed towards the RBD.  
295 **SARS-CoV-2 neutralization best correlates with RBD antibody response.**

296         To better understand how each antigen-specific antibody isotype correlated with  
297 neutralization, we compared the ELISA assay antibody titers with virus neutralization. While all

298 anti-RBD isotype titers correlated similarly with the neutralization level of the authentic SARS-  
299 CoV-2 ( $R^2 = 0.4786 - 0.5194$ ) (**Fig. 3a**), we found that pseudotyped virus neutralization correlated  
300 best with IgG titers ( $R^2 = 0.4561$ ) compared with IgA ( $R^2 = 0.2556$ ) or IgM ( $R^2 = 0.2391$ ) (**Fig.**  
301 **3b**). One explanation for these findings may be that there are molecular differences in folding  
302 between the RBD of the authentic virus, pseudotyped virus, and purified RBD such that they are  
303 recognized differently by antibody isotypes in these assays<sup>24,25</sup>. Interestingly, with the exception  
304 of anti-N IgG antibodies for the authentic virus ( $R^2 = 0.5277$ ;  $R^2 = 0.255$ ), other anti-N isotype  
305 titers showed weaker correlations for either the authentic SARS-CoV-2 virus or the pseudotyped  
306 virus (**Extended Data Fig. 4**). These data suggest that ELISA methods based on the RBD may  
307 benefit from detection of additional isotypes, rendering them better suited as predictors of sera  
308 neutralization.

309 **Robust SARS-CoV-2 neutralization associates with high-titer, multi-isotype antibody**  
310 **responses.**

311 Next, we delineated what separates our highest neutralizers from the remainder of the  
312 cohort using the data collected on antigen-specific antibody isotype titers. To do so, we employed  
313 a holistic approach and compared the IgG, IgM and IgA titers for both anti-Spike RBD and anti-  
314 N antibodies against neutralizations level (**Fig. 4a and b**). This revealed that the highest overall  
315 neutralizers (MIC higher or equal to 1/640) had higher titers of IgG, IgM and IgA raised against  
316 both Spike RBD and N (**Fig. 4a and b**, red bar). The spike protein is the major determinant for  
317 virus neutralization and resides on the outside of the viral particle, exposed to the immune  
318 recognition. Consequently, we found stronger correlations between Spike-RBD isotypes compared  
319 with N isotypes, when comparing each individual's IgG, IgM or IgA (anti-Spike RBD and N)  
320 against each other (**Fig. 4c and d**). However, in most cases the high neutralizers (red circles) had

321 the highest antibody titers for all isotypes (**Fig. 4c and 4d**). These data suggest that mounting a  
322 robust antibody response, consisting of diverse isotypes, leads to efficient neutralization.

323 **Recovered individuals have multiple combinations of anti-SARS-CoV-2 serum antibodies.**

324 Finally, given that having multiple isotypes associate with higher neutralization, we were  
325 interested in understanding the anti-RBD and N antibody signatures present in individuals and how  
326 they correlated with neutralization. Therefore, we classified whether the presence or absence of  
327 certain antigen-specific antibody isotypes (based on ELISA cutoffs) related to neutralization level.  
328 The 101 COVID-19 patients comprised 21 different antibody combinations, or “clusters” (**Fig.**  
329 **5a**), ranging from being positive for all six antibodies (N/RBD IgG, IgA, IgM) to three individuals  
330 who did not have antibodies to neither N or RBD (**Fig. 5a and b, Cluster U**). We found that 4 out  
331 of the 6 healthcare workers with high neutralizing titers (MIC = 1/640 – 1/2560) had sera that  
332 tested positive for all three isotypes (IgA, IgG, and IgM) responsive against both Spike RBD and  
333 N (**Fig. 5b, Cluster A**). However, two individuals with high neutralizing titers (#61 and 67)  
334 contained a combination of isotypes that were shared with both medium and low neutralizers (**Fig.**  
335 **5b, Clusters C and D**). Interestingly, Cluster B, which only lacks IgM against the RBD does not  
336 have high neutralization compared with Clusters A, C, and D, suggesting that specific antibody  
337 combinations and/or titers may be necessary for maximum neutralization. Finally, the majority of  
338 individuals had at least IgG and IgA directed against the RBD accompanied by IgG to N (**Fig. 5b**).  
339 Taken together, these results suggest that having IgG alone may not be enough for efficient  
340 neutralization, while having multiple isotypes at high titers present in serum leads to more potent  
341 SARS-CoV-2 neutralization.

342

343

## 344 **Discussion**

345           Understanding the antibody response and potential immunity to SARS-CoV-2 is critical  
346 for global public health and the development of efficacious vaccines<sup>1,3,26</sup>. In this study, we  
347 performed a comprehensive analysis of the SARS-CoV-2-specific antibody response in 101  
348 convalescent healthcare workers serum samples. We determined the neutralization capacity of the  
349 sera using both authentic virus and pseudotyped particles, quantified the titers of three antibody  
350 isotypes (IgG, IgM, and IgA) to both the spike receptor-binding domain and the nucleoprotein,  
351 and investigated the correlation of neutralization and antibody levels. We found, that the serum  
352 SARS-CoV-2 neutralizing antibody capacity was low for the majority of recovered individuals. In  
353 extreme cases, we detected no antibodies against SARS-CoV-2 Spike RBD or N in three  
354 individuals. These observations are in line with previously published studies and may suggest that  
355 those infected do not produce efficient neutralizing antibodies or neutralizing antibodies rapidly  
356 wane by the time samples are collected<sup>16,27,28,29</sup>. Detailed longitudinal studies are beginning to  
357 emerge, showing that serum antibody levels are relatively stable or decrease over time<sup>30-32</sup>. In-line  
358 with our results these studies find a positive correlation between IgG titers and  
359 neutralization<sup>31,32</sup>. Further characterization of neutralization at early and late timepoints is  
360 necessary to correlate antibody titer stability to viral protection. However, it is essential to keep in  
361 mind that, while neutralization titers can be quantified by reliable laboratory assays, we do not  
362 know the overall protective capacity of antibodies against SARS-CoV-2 in patients. Thus, those  
363 with low neutralizing capacities in the lab ( $MIC < 1/80$ ) could be efficiently protected from SARS-  
364 CoV-2 reinfection. Detailed studies monitoring initial and possible reinfections along with the  
365 antibody response are crucial to understand immunity to SARS-CoV-2.

366



367 To further understand the composition of convalescent sera, we quantified the amounts of IgG,  
368 IgA, and IgM targeting the spike protein RBD and N. We found 21 different antibody  
369 combinations that did not directly correlate with days post symptom onset, yet did associate with  
370 antibody neutralization. Of these combinations, the majority of individuals fell into four distinct  
371 clusters comprised of different antigen-specific isotypes. It remains to be elucidated how these  
372 clusters are generated and why certain clusters elicit potent SARS-CoV-2 neutralization (Cluster  
373 A) and others do not (Cluster B). Since we use a targeted approach focusing on only two antigens  
374 and specific epitopes, it is possible that there are other anti-SARS-CoV-2 antibodies that bind viral  
375 particles and impact neutralization<sup>33</sup>.

376 Interestingly, we found high quantities of IgM present in some individuals from 32 to 50  
377 days post symptom onset. These findings are intriguing since IgM antibodies are usually  
378 considered as a marker of a recent infection and their circulating titers are thought to decrease as  
379 class switching occurs to IgG and IgA. This observation is of importance for determining the  
380 relative time of infection. In this situation, looking at multiple isotypes including IgA as well as  
381 multiple antigens may be beneficial in determining the relative infection timeline. Along these  
382 lines, we also found that individuals having multiple antibodies isotypes to both RBD and N had  
383 the best neutralization. Moreover, we found that individuals who had IgG in combination with  
384 IgM and IgA against the RBD had the greatest neutralization capacity, suggesting that the  
385 generation of combinations of antibody isotypes against the RBD may provide the best  
386 neutralization. It has been shown that severity of disease can play an important role in the antibody  
387 response and it may be that in these individuals, disease is a driver for multiple isotypes and  
388 increased neutralization<sup>15,34</sup>. Thus, understanding how enhanced disease burden leads to the  
389 generation of multiple neutralizing isotypes will be crucial for vaccine development.

390           These results, particularly the presence of individuals with low neutralizing antibodies are  
391 interesting as each individual in our cohort has recovered from SARS-CoV-2 infection. This  
392 observation suggests that either we missed the period of robust neutralizing antibody production  
393 in certain individuals or other mechanisms, such as potent SARS-CoV-2 specific T-cell  
394 responses<sup>35,36,37-41</sup>, provided effective viral clearance and immunity. Future studies coupling  
395 assessment of antibody and T-cell responses with key clinical information (age, sex, severity of  
396 symptoms) will be essential to fully understand this complex immune response. Moreover, these  
397 results also highlight the need to study the SARS-CoV-2 genetics as the virus encodes multiple  
398 undefined accessory proteins that could impact the immune response during infection.  
399 Additionally, longitudinal studies are necessary to fully understand the complex immune response  
400 to SARS-CoV-2 in the hopes to contain this virus and to prepare for the emergence of related  
401 viruses.

402

### 403 **Acknowledgements**

404 We thank all the volunteers for participation in this study and the members of the NYU Vaccine  
405 Center and NYU Langone Health for obtaining these samples. We thank Drs. Chi Yun and Adriana  
406 Heguy for access to the Mantis instrument. We thank members of each lab for helpful comments  
407 and discussion on the study and manuscript.

408

409

410

411

412

413 **References**

- 414 1 Vabret, N. *et al.* Immunology of COVID-19: Current State of the Science. *Immunity* **52**,  
415 910-941, doi:10.1016/j.immuni.2020.05.002 (2020).
- 416 2 Bar-Zeev, N. & Moss, W. J. Encouraging results from phase 1/2 COVID-19 vaccine  
417 trials. *Lancet*, doi:10.1016/S0140-6736(20)31611-1 (2020).
- 418 3 Sempowski, G. D., Saunders, K. O., Acharya, P., Wiehe, K. J. & Haynes, B. F. Pandemic  
419 Preparedness: Developing Vaccines and Therapeutic Antibodies For COVID-19. *Cell*  
420 **181**, 1458-1463, doi:10.1016/j.cell.2020.05.041 (2020).
- 421 4 Stadlbauer, D. *et al.* SARS-CoV-2 Seroconversion in Humans: A Detailed Protocol for a  
422 Serological Assay, Antigen Production, and Test Setup. *Curr Protoc Microbiol* **57**, e100,  
423 doi:10.1002/cpmc.100 (2020).
- 424 5 Biggs, H. M. *et al.* Estimated Community Seroprevalence of SARS-CoV-2 Antibodies -  
425 Two Georgia Counties, April 28-May 3, 2020. *MMWR Morb Mortal Wkly Rep* **69**, 965-  
426 970, doi:10.15585/mmwr.mm6929e2 (2020).
- 427 6 Luchsinger, L. L. *et al.* Serological Analysis of New York City COVID19 Convalescent  
428 Plasma Donors. *medRxiv*, doi:10.1101/2020.06.08.20124792 (2020).
- 429 7 Krammer, F. & Simon, V. Serology assays to manage COVID-19. *Science* **368**, 1060-  
430 1061, doi:10.1126/science.abc1227 (2020).
- 431 8 Havers, F. P. *et al.* Seroprevalence of Antibodies to SARS-CoV-2 in 10 Sites in the  
432 United States, March 23-May 12, 2020. *JAMA Intern Med*,  
433 doi:10.1001/jamainternmed.2020.4130 (2020).
- 434 9 Amanat, F. *et al.* A serological assay to detect SARS-CoV-2 seroconversion in humans.  
435 *Nat Med* **26**, 1033-1036, doi:10.1038/s41591-020-0913-5 (2020).
- 436 10 Premkumar, L. *et al.* The receptor binding domain of the viral spike protein is an  
437 immunodominant and highly specific target of antibodies in SARS-CoV-2 patients. *Sci*  
438 *Immunol* **5**, doi:10.1126/sciimmunol.abc8413 (2020).
- 439 11 Seydoux, E. *et al.* Characterization of neutralizing antibodies from a SARS-CoV-2  
440 infected individual. *bioRxiv*, doi:10.1101/2020.05.12.091298 (2020).
- 441 12 Jiang, H. W. *et al.* SARS-CoV-2 proteome microarray for global profiling of COVID-19  
442 specific IgG and IgM responses. *Nat Commun* **11**, 3581, doi:10.1038/s41467-020-17488-  
443 8 (2020).
- 444 13 Amanat, F. *et al.* A serological assay to detect SARS-CoV-2 seroconversion in humans.  
445 *medRxiv*, doi:10.1101/2020.03.17.20037713 (2020).
- 446 14 Robbiani, D. F. *et al.* Convergent antibody responses to SARS-CoV-2 in convalescent  
447 individuals. *Nature*, doi:10.1038/s41586-020-2456-9 (2020).
- 448 15 Wang, Y. *et al.* Kinetics of viral load and antibody response in relation to COVID-19  
449 severity. *J Clin Invest*, doi:10.1172/JCI138759 (2020).
- 450 16 Liu, A. *et al.* Disappearance of antibodies to SARS-CoV-2 in a Covid-19 patient after  
451 recovery. *Clin Microbiol Infect*, doi:10.1016/j.cmi.2020.07.009 (2020).
- 452 17 Barnes, C. O. *et al.* Structures of human antibodies bound to SARS-CoV-2 spike reveal  
453 common epitopes and recurrent features of antibodies. *bioRxiv*,  
454 doi:10.1101/2020.05.28.121533 (2020).
- 455 18 Dogan, M. *et al.* Novel SARS-CoV-2 specific antibody and neutralization assays reveal  
456 wide range of humoral immune response during COVID-19. *medRxiv*,  
457 doi:10.1101/2020.07.07.20148106 (2020).

- 458 19 Harcourt, J. *et al.* Isolation and characterization of SARS-CoV-2 from the first US  
459 COVID-19 patient. *bioRxiv*, doi:10.1101/2020.03.02.972935 (2020).
- 460 20 Crawford, K. H. D. *et al.* Protocol and Reagents for Pseudotyping Lentiviral Particles  
461 with SARS-CoV-2 Spike Protein for Neutralization Assays. *Viruses* **12**,  
462 doi:10.3390/v12050513 (2020).
- 463 21 Zost, S. J. *et al.* Potently neutralizing and protective human antibodies against SARS-  
464 CoV-2. *Nature*, doi:10.1038/s41586-020-2548-6 (2020).
- 465 22 Schmidt, F. *et al.* Measuring SARS-CoV-2 neutralizing antibody activity using  
466 pseudotyped and chimeric viruses. *J Exp Med* **217**, doi:10.1084/jem.20201181 (2020).
- 467 23 Leung, D. T. *et al.* Antibody response of patients with severe acute respiratory syndrome  
468 (SARS) targets the viral nucleocapsid. *J Infect Dis* **190**, 379-386, doi:10.1086/422040  
469 (2004).
- 470 24 Shang, J. *et al.* Cell entry mechanisms of SARS-CoV-2. *Proc Natl Acad Sci U S A* **117**,  
471 11727-11734, doi:10.1073/pnas.2003138117 (2020).
- 472 25 Ravichandran, S. *et al.* Antibody signature induced by SARS-CoV-2 spike protein  
473 immunogens in rabbits. *Sci Transl Med* **12**, doi:10.1126/scitranslmed.abc3539 (2020).
- 474 26 Zohar, T. & Alter, G. Dissecting antibody-mediated protection against SARS-CoV-2. *Nat*  
475 *Rev Immunol* **20**, 392-394, doi:10.1038/s41577-020-0359-5 (2020).
- 476 27 Wu, L. P. *et al.* Duration of antibody responses after severe acute respiratory syndrome.  
477 *Emerg Infect Dis* **13**, 1562-1564, doi:10.3201/eid1310.070576 (2007).
- 478 28 Vabret, N. Antibody responses to SARS-CoV-2 short-lived. *Nat Rev Immunol*,  
479 doi:10.1038/s41577-020-0405-3 (2020).
- 480 29 Robbiani, D. F. *et al.* Convergent Antibody Responses to SARS-CoV-2 Infection in  
481 Convalescent Individuals. *bioRxiv*, doi:10.1101/2020.05.13.092619 (2020).
- 482 30 Wang, K. *et al.* Longitudinal dynamics of the neutralizing antibody response to SARS-  
483 CoV-2 infection. *Clin Infect Dis*, doi:10.1093/cid/ciaa1143 (2020).
- 484 31 Wajnberg, A. *et al.* SARS-CoV-2 infection induces robust, neutralizing antibody  
485 responses that are stable for at least three months. *medRxiv*, 2020.2007.2014.20151126,  
486 doi:10.1101/2020.07.14.20151126 (2020).
- 487 32 Suhandynata, R. T. *et al.* Commercial Serology Assays Predict Neutralization Activity  
488 Against SARS-CoV-2. *medRxiv*, 2020.2007.2010.20150946,  
489 doi:10.1101/2020.07.10.20150946 (2020).
- 490 33 Jiang, S., Hillyer, C. & Du, L. Neutralizing Antibodies against SARS-CoV-2 and Other  
491 Human Coronaviruses: (Trends in Immunology 41, 355-359; 2020). *Trends Immunol* **41**,  
492 545, doi:10.1016/j.it.2020.04.008 (2020).
- 493 34 Phipps, W. S. *et al.* SARS-CoV-2 Antibody Responses Do Not Predict COVID-19  
494 Disease Severity. *Am J Clin Pathol*, doi:10.1093/ajcp/aqaa123 (2020).
- 495 35 Elizaldi, S. R. *et al.* SARS-CoV-2 infection induces germinal center responses with  
496 robust stimulation of CD4 T follicular helper cells in rhesus macaques. *bioRxiv*,  
497 doi:10.1101/2020.07.07.191007 (2020).
- 498 36 Schultheiss, C. *et al.* Next-Generation Sequencing of T and B Cell Receptor Repertoires  
499 from COVID-19 Patients Showed Signatures Associated with Severity of Disease.  
500 *Immunity*, doi:10.1016/j.immuni.2020.06.024 (2020).
- 501 37 Peng, Y. *et al.* Broad and strong memory CD4 (+) and CD8 (+) T cells induced by  
502 SARS-CoV-2 in UK convalescent COVID-19 patients. *bioRxiv*,  
503 doi:10.1101/2020.06.05.134551 (2020).

504 38 Juno, J. A. *et al.* Humoral and circulating follicular helper T cell responses in recovered  
505 patients with COVID-19. *Nat Med*, doi:10.1038/s41591-020-0995-0 (2020).

506 39 Grifoni, A. *et al.* Targets of T Cell Responses to SARS-CoV-2 Coronavirus in Humans  
507 with COVID-19 Disease and Unexposed Individuals. *Cell* **181**, 1489-1501 e1415,  
508 doi:10.1016/j.cell.2020.05.015 (2020).

509 40 Channappanavar, R., Zhao, J. & Perlman, S. T cell-mediated immune response to  
510 respiratory coronaviruses. *Immunol Res* **59**, 118-128, doi:10.1007/s12026-014-8534-z  
511 (2014).

512 41 Altmann, D. M. & Boyton, R. J. SARS-CoV-2 T cell immunity: Specificity, function,  
513 durability, and role in protection. *Sci Immunol* **5**, doi:10.1126/sciimmunol.abd6160  
514 (2020).

515  
516  
517  
518  
519  
520  
521  
522  
523  
524  
525  
526  
527  
528  
529  
530  
531  
532  
533  
534  
535  
536  
537  
538  
539  
540  
541  
542  
543  
544  
545  
546  
547  
548

**Extended Data Table 1: SARS-CoV-2 positive NYU healthcare worker information and data used in this study.**

| COVID-19 Patient # | Sympt. onset date | Days post sympt. onset | Anti-N ELISA* |       |       | Anti-RBD ELISA** |       |       | Neutralization SARS-CoV-2 | Neutralization Pseudotyped virus |        |
|--------------------|-------------------|------------------------|---------------|-------|-------|------------------|-------|-------|---------------------------|----------------------------------|--------|
|                    |                   |                        | IgG           | IgA   | IgM   | IgG              | IgA   | IgM   |                           | 1/MIC                            | 1/IC90 |
| 1                  | 3/16/20           | 43                     | 31.59         | 5.54  | 24.32 | 2.152            | 0.344 | 0.211 | 40                        | 44.9                             | 108    |
| 2                  | 3/18/20           | 41                     | 18.14         | 0.58  | 9.26  | 0.892            | 0.244 | 0.217 | 20                        | 32.83                            | 125    |
| 3                  | 3/17/20           | 42                     | 38.76         | 3.6   | 5.58  | 2.943            | 0.927 | 0.257 | 160                       | 127.7                            | 361    |
| 4                  | 3/12/20           | 47                     | 9.24          | 0.43  | 0.71  | 1.921            | 0.214 | 0.209 | 20                        | 27.7                             | 61     |
| 5                  | 3/20/20           | 39                     | 7.56          | 0.77  | 4.42  | 0.88             | 0.19  | 0.202 | 40                        | 18.69                            | 44     |
| 6                  | 3/19/20           | 40                     | 37.18         | 4.03  | 11.76 | 2.857            | 0.545 | 0.441 | 80                        | 57.75                            | 121    |
| 7                  | 3/15/20           | 44                     | 17.47         | 0.31  | 1.97  | 2.627            | 0.183 | 0.204 | 40                        | 42.9                             | 121    |
| 8                  | 3/19/20           | 40                     | 7.58          | 3.54  | 19.43 | 2.068            | 0.987 | 0.216 | 40                        | 40.93                            | 95     |
| 9                  | 3/8/20            | 51                     | 27.15         | 2.92  | 12.8  | 2.666            | 0.345 | 0.532 | 80                        | 64.58                            | 181    |
| 10                 | 3/18/20           | 41                     | 41.83         | 3.23  | 16.48 | 2.848            | 1.314 | 2.514 | 320                       | 120.4                            | 1094   |
| 11                 | 3/17/20           | 42                     | 24.15         | 1.14  | 10    | 1.783            | 0.338 | 0.466 | 40                        | 16.5                             | 59     |
| 12                 | 3/11/20           | 48                     | 37.95         | 5.78  | 1.52  | 2.281            | 0.507 | 0.437 | 80                        | 22.88                            | 94     |
| 13                 | 3/9/20            | 50                     | 41.84         | 45.02 | 35.09 | 2.993            | 3.364 | 3.296 | 2560                      | 157.1                            | 1919   |
| 14                 | 3/17/20           | 42                     | 24.4          | 0.74  | 4.53  | 2.301            | 0.555 | 0.31  | 80                        | 12.31                            | 77     |
| 15                 | 3/16/20           | 43                     | 23.79         | 1.11  | 6.15  | 2.452            | 0.583 | 1.811 | 160                       | 40.52                            | 107    |
| 16                 | 3/19/20           | 40                     | 7.29          | 3.29  | 6.7   | 2.068            | 1.041 | 0.553 | 40                        | 18.01                            | 97     |
| 17                 | 3/28/20           | 41                     | 15.5          | 17.09 | 12.11 | 1.008            | 0.178 | 0.616 | 40                        | 50.47                            | 163    |
| 18                 | 3/13/20           | 46                     | 29.12         | 4.8   | 33.01 | 1.532            | 0.379 | 0.829 | 160                       | 58.97                            | 170    |
| 19                 | 3/24/20           | 35                     | 5.98          | 0.95  | 4.73  | 1.091            | 0.204 | 0.328 | 40                        | 20.99                            | 91     |
| 20                 | 3/20/20           | 39                     | 17.41         | 5.26  | 25.58 | 2.788            | 0.501 | 0.773 | 160                       | 86.11                            | 282    |
| 21                 | 3/18/20           | 41                     | 5.09          | 1.08  | 1.66  | 1.388            | 0.233 | 0.295 | 40                        | 17.51                            | 63     |
| 22                 | 3/20/20           | 39                     | 37.97         | 95.17 | 19.05 | 3.064            | 2.564 | 1.312 | 640                       | 187.3                            | 4752   |
| 23                 | 3/4/20            | 55                     | 37.55         | 11.99 | 25.16 | 2.708            | 0.414 | 0.285 | 80                        | 88.19                            | 299    |
| 24                 | 3/2/20            | 57                     | 12.97         | 0.52  | 19.24 | 2.068            | 0.328 | 0.482 | 80                        | 33.73                            | 305    |
| 25                 | 3/6/20            | 53                     | 34.37         | 0.52  | 5.2   | 1.846            | 0.307 | 0.44  | 40                        | 26.55                            | 116    |
| 26                 | 3/23/20           | 36                     | 13.11         | 1.51  | 1.09  | 2.114            | 0.275 | 0.222 | 20                        | 10.23                            | 92     |
| 27                 | 3/20/20           | 39                     | 7.6           | 0.34  | 9.31  | 1.712            | 0.338 | 0.351 | 20                        | 13.78                            | 52     |
| 28                 | 3/24/20           | 35                     | 17.53         | 1.08  | 5.92  | 1.884            | 0.707 | 0.399 | 40                        | 26.87                            | 91     |
| 29                 | 3/25/20           | 34                     | 32.97         | 2.34  | 16.96 | 2.764            | 2.091 | 3.035 | 160                       | 77.9                             | 195    |
| 30                 | 3/22/20           | 37                     | 32.52         | 5.29  | 3.18  | 2.772            | 1.522 | 0.74  | 80                        | 62.62                            | 221    |
| 31                 | 3/20/20           | 39                     | 6.22          | 4.4   | 3.64  | 1.471            | 0.532 | 0.335 | 20                        | 13.31                            | 65     |
| 32                 | 3/20/20           | 39                     | 26.69         | 4.03  | 15.65 | 2.457            | 3.034 | 0.956 | 160                       | 37.89                            | 131    |
| 33                 | 3/20/20           | 39                     | 21.03         | 1.2   | 3.09  | 1.752            | 0.209 | 0.455 | 40                        | 63.95                            | 182    |
| 34                 | 3/21/20           | 38                     | 50.25         | 9.56  | 39.24 | 2.848            | 3.452 | 2.398 | 640                       | 175.9                            | 1509   |
| 35                 | 3/23/20           | 36                     | 22.76         | 1.2   | 6.1   | 1.469            | 0.584 | 0.896 | 160                       | 38.32                            | 117    |
| 36                 | 3/16/20           | 43                     | 4.01          | 0.86  | 3.96  | 1.528            | 0.37  | 0.519 | 40                        | 49.28                            | 145    |
| 37                 | 3/15/20           | 44                     | 6.89          | 0.86  | 10.95 | 0.898            | 0.594 | 0.472 | Neg                       | 7.66                             | 34     |
| 38                 | 3/19/20           | 40                     | 16.11         | 0.49  | 11.15 | 2.11             | 0.303 | 0.177 | 40                        | 40.05                            | 150    |
| 39                 | 3/21/20           | 38                     | 29.52         | 2.77  | 5.28  | 2.602            | 1.752 | 0.796 | 80                        | 73.12                            | 272    |
| 40                 | 3/19/20           | 40                     | 6.5           | 1.26  | 2.85  | 1.203            | 0.228 | 0.443 | 20                        | 3.33                             | 36     |
| 41                 | 3/15/20           | 44                     | 34.99         | 0.65  | 4.28  | 1.76             | 0.313 | 0.582 | 40                        | 20.6                             | 92     |
| 42                 | 3/16/20           | 43                     | 5.59          | 0.58  | 11.97 | 1.804            | 0.274 | 0.602 | 40                        | 42.1                             | 248    |
| 43                 | 3/24/20           | 35                     | 32.38         | 4.74  | 18.91 | 2.019            | 0.48  | 0.706 | 80                        | 42.33                            | 152    |
| 44                 | 3/14/20           | 45                     | 32.36         | 1.14  | 8.27  | 1.829            | 0.761 | 0.413 | 20                        | 25.9                             | 88     |
| 45                 | 3/19/20           | 40                     | 40.06         | 0.74  | 1.43  | 1.624            | 0.255 | 0.382 | 80                        | 25.36                            | 121    |
| 46                 | 3/16/20           | 43                     | 15.22         | 1.26  | 17.94 | 1.778            | 0.35  | 0.834 | 80                        | 30.3                             | 122    |
| 47                 | 3/20/20           | 39                     | 27.9          | 3.38  | 13.16 | 1.664            | 0.404 | 0.713 | 40                        | 3.04                             | 60     |
| 48                 | 3/20/20           | 39                     | 24.34         | 0.68  | 6.93  | 1.468            | 0.289 | 1.293 | 160                       | 38.18                            | 345    |
| 49                 | 3/19/20           | 40                     | 19.7          | 6.86  | 1.74  | 1.965            | 0.53  | 0.278 | 40                        | 35.9                             | 148    |
| 50                 | 3/27/20           | 32                     | 15.54         | 1.08  | 2.38  | 2.191            | 0.487 | 0.113 | 80                        | 30.31                            | 137    |
| 51                 | 3/23/20           | 36                     | 24.6          | 1.6   | 10.88 | 2.221            | 0.223 | 0.272 | 80                        | 18.7                             | 83     |

|     |         |    |       |       |       |       |       |       |      |       |      |
|-----|---------|----|-------|-------|-------|-------|-------|-------|------|-------|------|
| 52  | 3/27/20 | 32 | 36.07 | 4.15  | 20.35 | 2.896 | 1.079 | 0.484 | 80   | 41.24 | 235  |
| 53  | 3/15/20 | 44 | 41.3  | 3.81  | 3.39  | 2.701 | 0.723 | 1.381 | 320  | 77.67 | 1101 |
| 54  | 3/20/20 | 39 | 56.66 | 1.97  | 5.68  | 2.703 | 0.317 | 0.844 | 320  | 55.85 | 765  |
| 55  | 3/19/20 | 40 | 13.23 | 0.74  | 9.83  | 1.094 | 0.139 | 0.479 | 40   | 0.776 | 10   |
| 56  | 3/19/20 | 40 | 11.12 | 1.48  | 7.88  | 1.977 | 0.215 | 1.641 | 40   | 15.02 | 53   |
| 57  | 3/18/20 | 41 | 12.85 | 5.14  | 11.17 | 0.977 | 0.287 | 0.582 | 20   | 13.61 | 38   |
| 58  | 3/26/20 | 33 | 41.54 | 4.27  | 13.32 | 2.754 | 0.363 | 0.927 | 160  | 77.31 | 243  |
| 59  | 3/19/20 | 40 | 46.08 | 4.55  | 7.03  | 2.985 | 0.436 | 0.781 | 80   | 21.98 | 524  |
| 60  | 3/14/20 | 45 | 18.7  | 4.74  | 31.09 | 1.714 | 0.411 | 0.399 | 40   | 11.49 | 48   |
| 61  | 3/20/20 | 39 | 27.36 | 4.89  | 10.22 | 2.872 | 2.197 | 2.89  | 640  | 321.3 | 785  |
| 62  | 3/23/20 | 36 | 31.91 | 0.92  | 5.15  | 3.227 | 0.974 | 1.667 | 160  | 98.68 | 1729 |
| 63  | 3/18/20 | 41 | 39.41 | 15.62 | 13.18 | 1.967 | 0.308 | 0.421 | 40   | 1.105 | 27   |
| 64  | 3/15/20 | 44 | 15.48 | 0.86  | 2.49  | 1.874 | 0.248 | 1.104 | 40   | 54.83 | 253  |
| 65  | 3/22/20 | 37 | 6.26  | 1.41  | 15.27 | 0.598 | 0.282 | 0.344 | 20   | 9.62  | 36   |
| 66  | 3/20/20 | 39 | 26.32 | 1.91  | 17.7  | 2.08  | 0.324 | 0.64  | 160  | 60.52 | 239  |
| 67  | 3/9/20  | 50 | 42.07 | 2.89  | 6.98  | 2.971 | 0.706 | 1.04  | 640  | 227.7 | 577  |
| 68  | 3/6/20  | 53 | 12.03 | 0.52  | 1.5   | 1.261 | 0.301 | 0.372 | 40   | 16.19 | 88   |
| 69  | 3/26/20 | 33 | 15.64 | 10.42 | 2.97  | 1.818 | 0.516 | 0.369 | 40   | 21.06 | 56   |
| 70  | 3/21/20 | 38 | 33.25 | 2.86  | 5.03  | 3.209 | 1.252 | 1.078 | 320  | 118.5 | 420  |
| 71  | 3/26/20 | 33 | 22.59 | 0.71  | 11.9  | 2.768 | 0.768 | 0.45  | 40   | 27.79 | 94   |
| 72  | 3/23/20 | 36 | 25.07 | 1.91  | 6.49  | 2.906 | 0.329 | 1.275 | 160  | 54.04 | 149  |
| 73  | 3/19/20 | 40 | 21.05 | 0.55  | 1.55  | 1.84  | 0.181 | 0.388 | 40   | 72.73 | 178  |
| 74  | 3/21/20 | 38 | 12.26 | 0.98  | 6.55  | 0.525 | 0.175 | 0.514 | 20   | 26.93 | 88   |
| 75  | 3/24/20 | 35 | 6.79  | 0.62  | 2.02  | 1.73  | 0.121 | 0.272 | 20   | 15.35 | 52   |
| 76  | 3/23/20 | 36 | 40.43 | 2.95  | 16.96 | nd    | nd    | nd    | 80   | 90.81 | 324  |
| 77  | 3/16/20 | 43 | 22.11 | 0.4   | 4.51  | 2.205 | 0.364 | 0.907 | 40   | 50.05 | 158  |
| 78  | 3/22/20 | 37 | 51.14 | 7.93  | 52.71 | 3.197 | 1.149 | 1.417 | 320  | 86.66 | 716  |
| 79  | 3/26/20 | 33 | 11.02 | 0.31  | 4.09  | 0.829 | 0.171 | 0.771 | 40   | 12.67 | 60   |
| 80  | 3/20/20 | 39 | 20.06 | 0.31  | 3.56  | 2.665 | 0.421 | 0.801 | 40   | 50.24 | 171  |
| 81  | 3/22/20 | 37 | 2.43  | 2.37  | 2.71  | 0.76  | 0.121 | 0.399 | Neg  | 7.09  | 35   |
| 82  | 3/24/20 | 35 | 19.35 | 1.11  | 21.83 | 0.603 | 0.257 | 0.659 | 20   | neg   | neg  |
| 83  | 3/26/20 | 33 | 37.87 | 8.49  | 52.71 | 3.265 | 3.204 | 1.204 | 320  | 152.8 | 2819 |
| 84  | 3/26/20 | 33 | 41.3  | 35.55 | 52.71 | 3.184 | 2.454 | 2.725 | 1280 | 195.1 | 538  |
| 85  | 3/19/20 | 40 | 10.9  | 2.12  | 3.26  | 1.819 | 0.177 | 0.191 | 20   | 51.81 | 132  |
| 86  | 3/24/20 | 38 | 10.92 | 1.01  | 6.65  | nd    | nd    | nd    | 20   | 9.92  | 49   |
| 87  | 3/17/20 | 45 | 7.98  | 2.31  | 5.82  | 1.571 | 0.176 | 0.923 | 20   | 26.96 | 83   |
| 88  | 3/8/20  | 54 | 38.89 | 3.91  | 23.07 | 2.794 | 0.391 | 1.079 | 80   | 63.96 | 250  |
| 89  | 3/26/20 | 36 | 53.11 | 15.04 | 5.13  | 3.066 | 1.041 | 0.639 | 320  | 115.4 | 465  |
| 90  | 3/22/20 | 40 | 30.4  | 3.47  | 7.82  | 3.019 | 0.205 | 0.461 | 80   | 96.81 | 311  |
| 91  | 3/15/20 | 47 | 12.26 | 0.55  | 1.78  | 0.82  | 0.094 | 0.326 | 20   | 4.66  | 36   |
| 92  | 3/27/20 | 35 | 19.63 | 0.72  | 2.41  | 2.257 | 0.488 | 0.305 | 40   | 42.43 | 135  |
| 93  | 3/17/20 | 45 | 29.03 | 0.74  | 2.17  | 2.861 | 0.671 | 0.735 | 80   | 92.69 | 270  |
| 94  | 3/28/20 | 34 | 15.73 | 3.75  | 4.75  | 2.471 | 0.384 | 0.454 | 80   | 85.51 | 218  |
| 95  | 3/20/20 | 42 | 31.75 | 2.45  | 5.49  | 2.493 | 0.296 | 0.532 | 40   | 31.98 | 125  |
| 96  | 3/20/20 | 42 | 28.53 | 2.27  | 11.82 | 2.777 | 0.899 | 0.729 | 80   | 47.39 | 176  |
| 97  | 3/25/20 | 37 | 33.44 | 31.98 | 4.32  | 2.419 | 0.351 | 0.536 | 80   | 47.98 | 170  |
| 98  | 3/19/20 | 43 | 20.89 | 1.54  | 8.85  | 1.913 | 0.602 | 0.612 | 40   | 12.62 | 55   |
| 99  | 3/13/20 | 49 | 36.93 | 4.47  | 8.72  | 2.463 | 1.887 | 0.583 | 160  | 54.63 | 299  |
| 100 | 3/28/20 | 34 | 18.94 | 6.92  | 6.99  | 1.122 | 0.347 | 0.339 | 40   | 21    | 111  |
| 101 | 3/27/20 | 35 | 4.99  | 1.54  | 2.33  | 0.796 | 0.147 | 0.261 | 20   | 23.55 | 68   |

\*Threshold for Anti-NP ELISA (IgG, IgM, IgA OD<sub>450</sub> < 9).

\*\*Threshold for Anti-RBD ELISA (-IgG is OD<sub>490nm</sub> = 1.091; -IgM is OD<sub>490nm</sub> = 0.256 and -IgA is OD<sub>490nm</sub> = 0.694). nd. measures not included in the analysis.

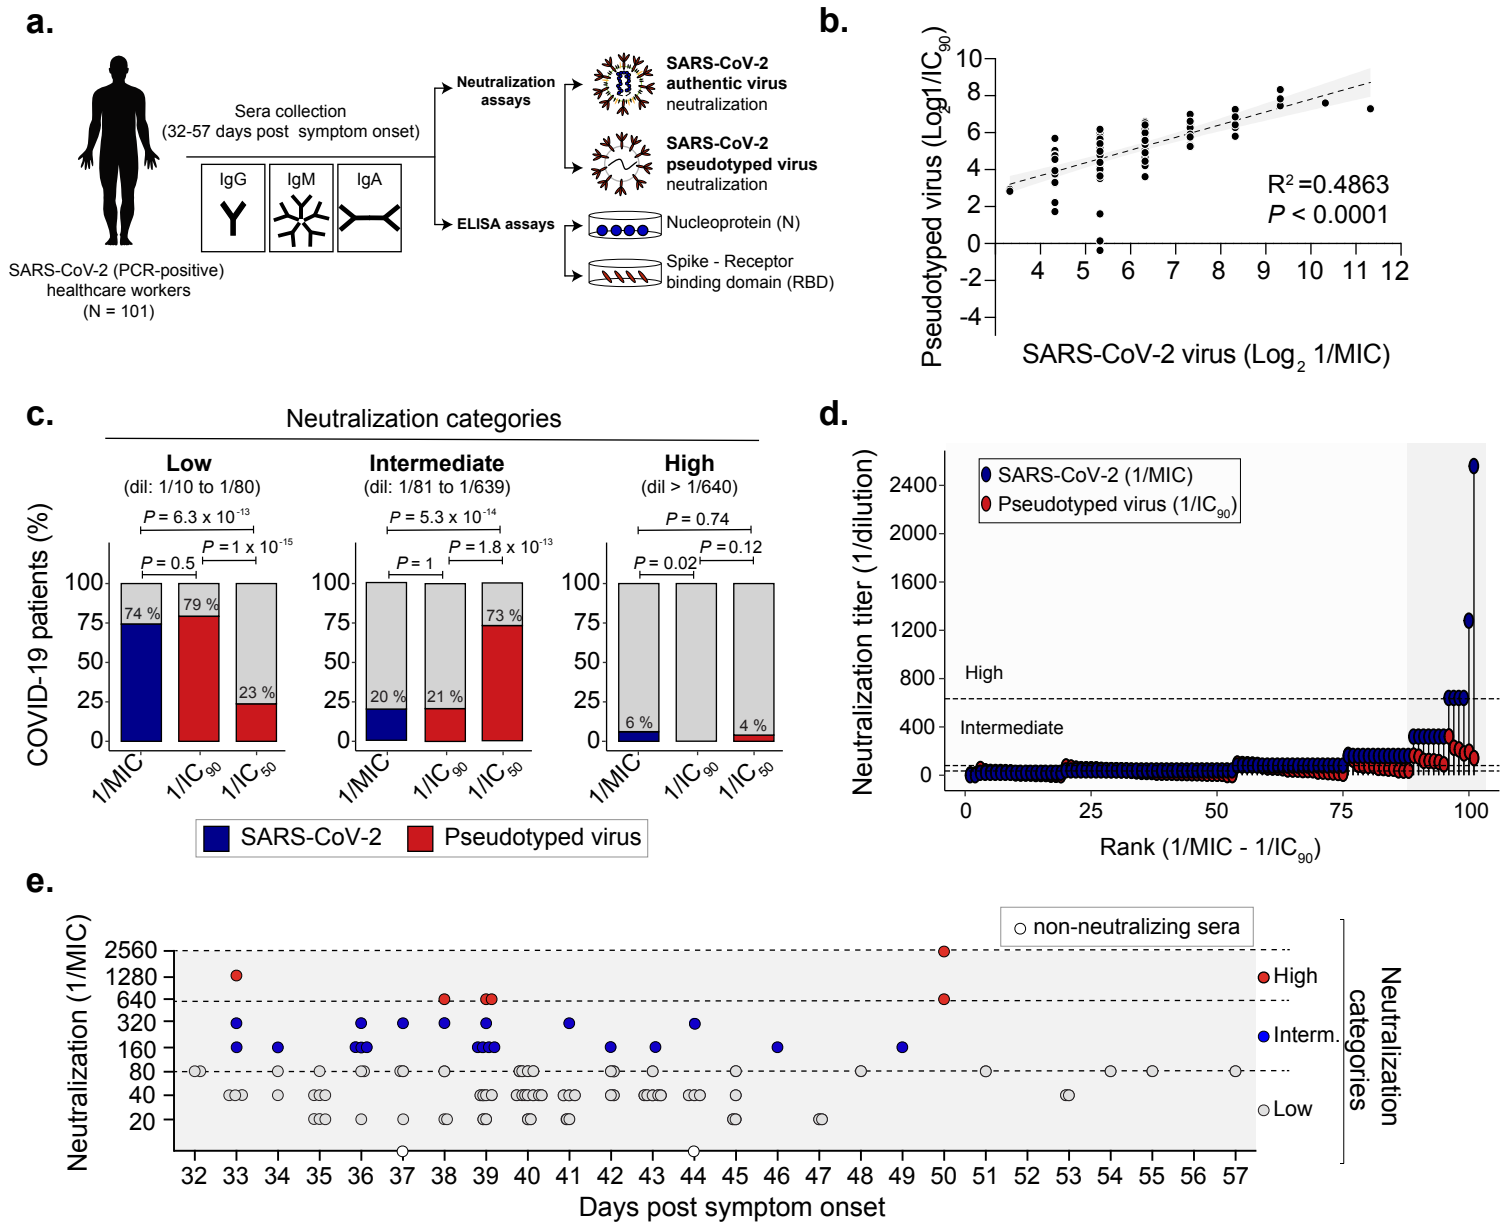

**Figure 1. SARS-CoV-2 neutralizing antibody response.** **a.** Schematic representation of the experimental design. **b.** Correlation analysis of the sera neutralization level of 101 COVID-19 convalescent patients. The data presented are the log<sub>2</sub> of the neutralization titer against the authentic SARS-CoV-2 virus (1/MIC) and the pseudotyped virus (1/IC<sub>90</sub>). Correlation and linear regression analyses were performed using GraphPad Prism 8. P values were calculated using a two-sided F-test. **c.** SARS-CoV-2 neutralization categories. Sera of convalescent patients was defined as low (dil:1/10 to 1/80), intermediate (dil:1/81 to 1/639) and high (dil > 1/640) based on authentic SARS-CoV-2 virus (blue box) or pseudotyped virus (red box). P values were calculated using two-sided Fisher's exact test. **d.** Rank of the absolute differences in neutralization capacity from sera of 101 COVID-19 convalescent patients. Neutralization titers against SARS-CoV-2 virus (blue) or pseudotyped virus (red) was ordered based on the absolute difference between 1/MIC and 1/IC<sub>90</sub>. Dashed lines indicate the different neutralization categories. The gray box highlights those samples with the highest absolute difference in the neutralization capacity between SARS-CoV-2 virus (blue) or pseudotyped virus (red). **e.** Distribution of authentic SARS-CoV-2 virus neutralization titers (1/MIC) over days post symptom onset. Dashed lines indicate the neutralization levels as defined in panel B. White dots indicate two individuals with SARS-CoV-2 non-neutralizing sera.



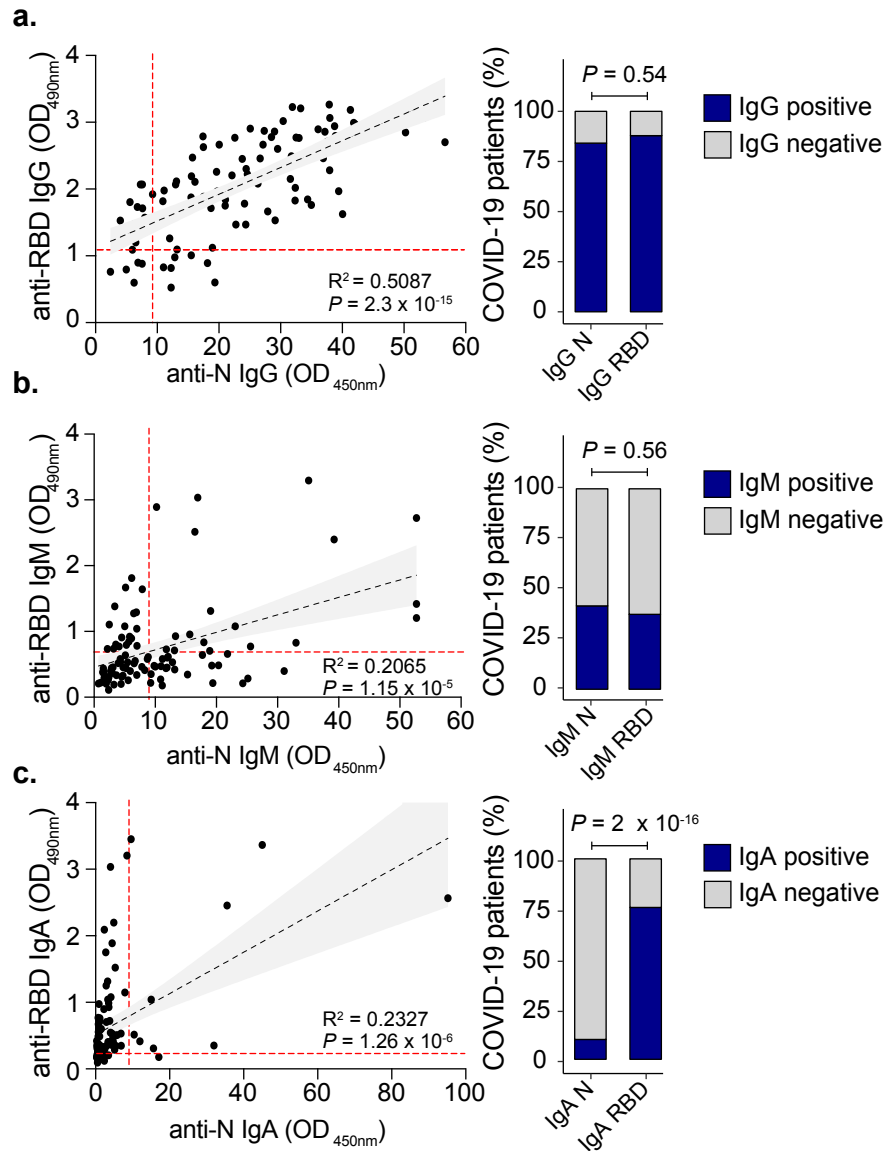

**Figure 2. Isotype composition of SARS-CoV2 convalescent serum. Anti-RBD and anti-N ELISA correlation for IgG (a), IgM (b) and IgA (c).** Left panels: Correlations and linear regressions comparing anti-RBD and anti-N for each antibody isotype (N=101). Analyses were performed using GraphPad Prism 8. P values were calculated using a two-sided F-test. The red dashed lines indicate the threshold (anti-N ELISA for -IgG, -IgM or -IgA are OD<sub>450nm</sub> = 9; anti-RBD ELISA for -IgG is OD<sub>490nm</sub> = 1.091; -IgM is OD<sub>490nm</sub> = 0.256 and -IgA is OD<sub>490nm</sub> = 0.694) for each ELISA. Right panels indicate the percentage of COVID-19 PCR-positive patients that are positive (blue bars) or negative (gray bars) for IgG (a), IgM (b) or IgA (c). P values were calculated using two-sided Fisher's exact test.

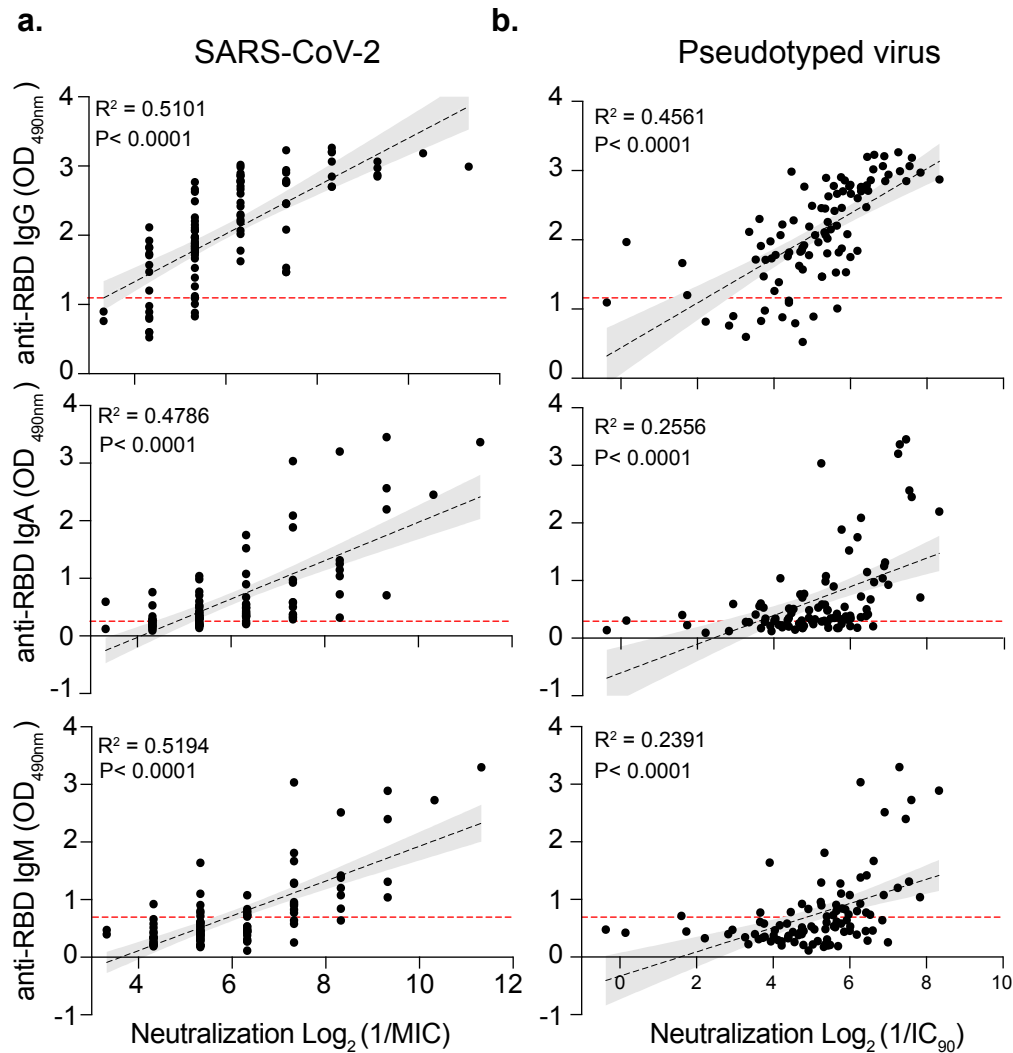

**Figure 3. Correlation of anti-RBD antibody isotypes with viral neutralization.** Anti-RBD ELISA correlation for IgG (top), IgA (Middle) and IgM (Bottom) with viral neutralization using authentic SARS-CoV-2 (a) or Pseudotyped virus (b). Correlation and linear regression analyses were performed using GraphPad Prism 8. P values were calculated using a two-sided F-test. The red dashed lines indicate the threshold (anti-RBD ELISA for -IgG is OD<sub>490nm</sub> = 1.091; -IgM is OD<sub>490nm</sub> = 0.256 and -IgA is OD<sub>490nm</sub> = 0.694) for each ELISA.

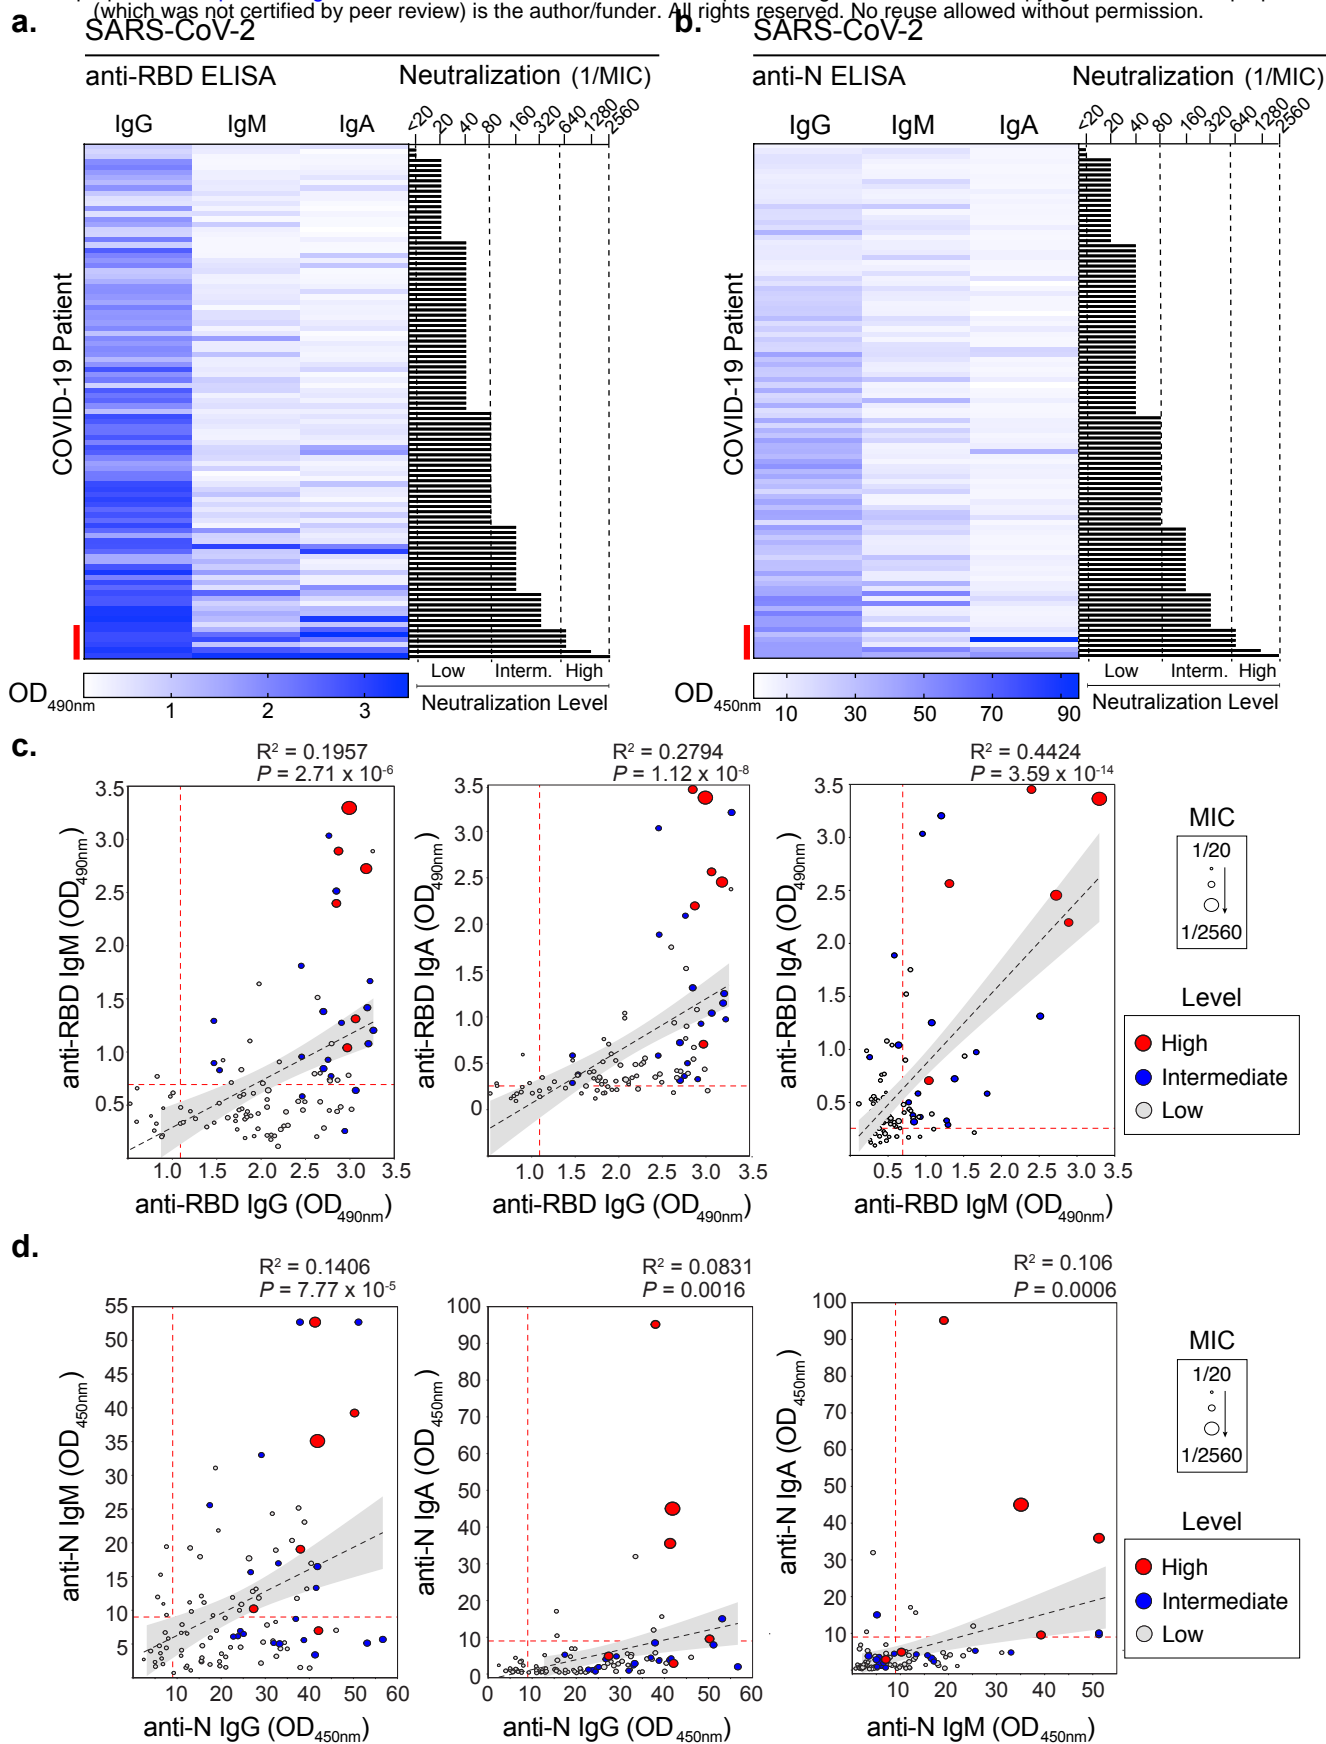

**Figure 4. Identification of serological signatures for neutralization.** Heatmap of anti-RBD (a) and anti-N (b) antibody isotype ELISA titers and corresponding authentic SARS-CoV-2 neutralization. Serological data from the 101 COVID-19 patients was ranked from low to high neutralization. Sera of convalescent patients was defined as low (dil:1/10 to 1/80), intermediate (dil:1/81 to 1/639) and high (dil > 1/640). Red bar indicates those COVID-19 patients with high neutralizer antibodies. c. Correlation analysis of anti-RBD IgM vs IgG (left panel), anti-RBD IgA vs IgG (middle panel) and anti-RBD IgA vs IgM (right panel). d. Correlation analysis of anti-N IgM vs IgG (left panel), anti-N IgA vs IgG (middle panel) and anti-N IgA vs IgM (right panel). For (c) and (d) correlation and linear regression analyses were performed using the linear model function in R (lm). P values were calculated using a two-sided F-test. The size of the dots indicates the MIC and the color of the dots indicates the neutralization category: High (red dots), Intermediate (blue) and Low (gray) as determined using authentic SARS-CoV-2 neutralization (see Fig. 2 legend).

a.

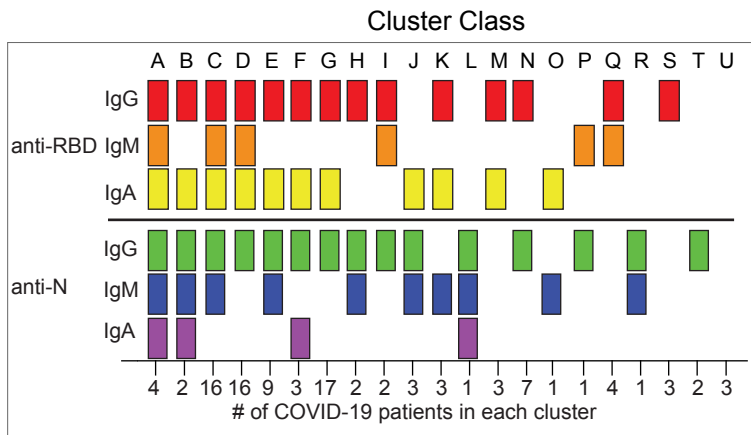

b.

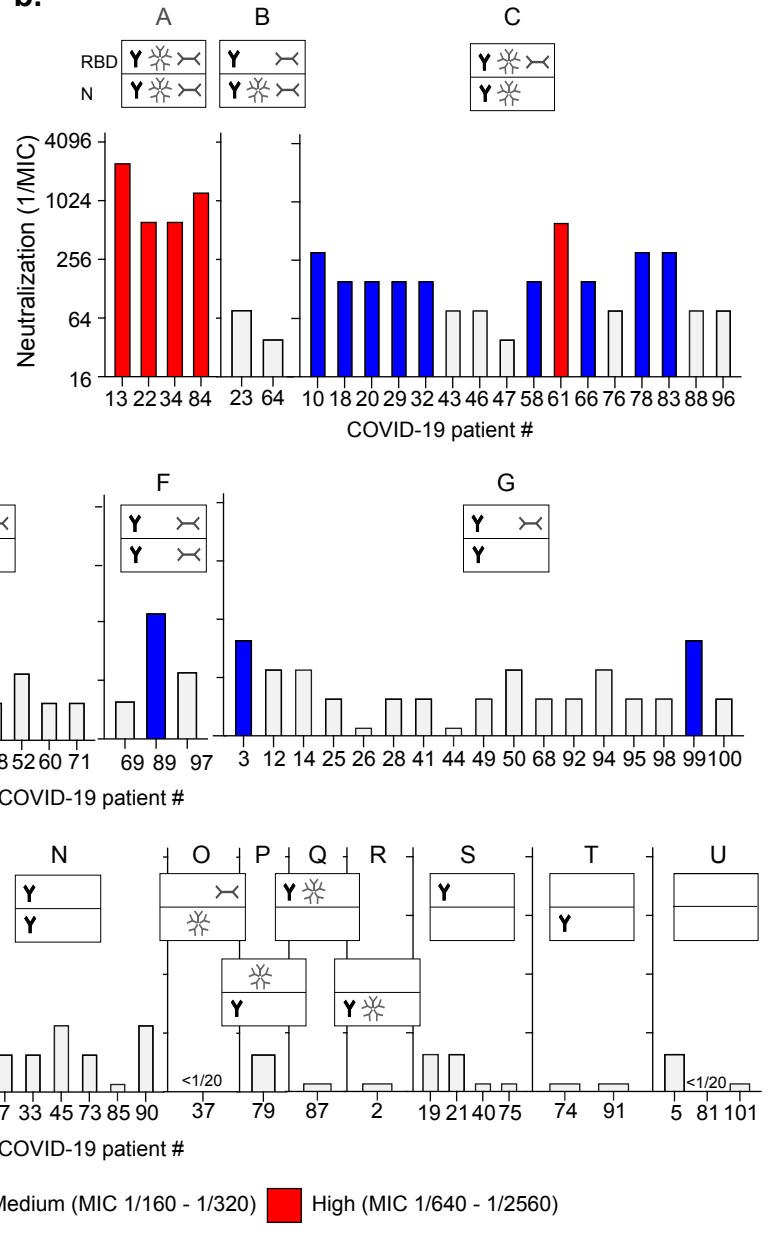

**Figure 5. Clustering analysis of individual SARS-CoV-2 antibody response.** a. Combination of antibody isotypes in individual patient sera defining different cluster classes. ELISA titers were categorized as positive (ELISA titers > cutoff) or negative (ELISA titer < cutoff) for each sample for each individual antibody isotype. Clusters were made based on the presence or absence of specific isotypes (Cluster A to U). The number of patients in each cluster is shown on the x axis. b. Neutralization levels shown for each individual antibody cluster.

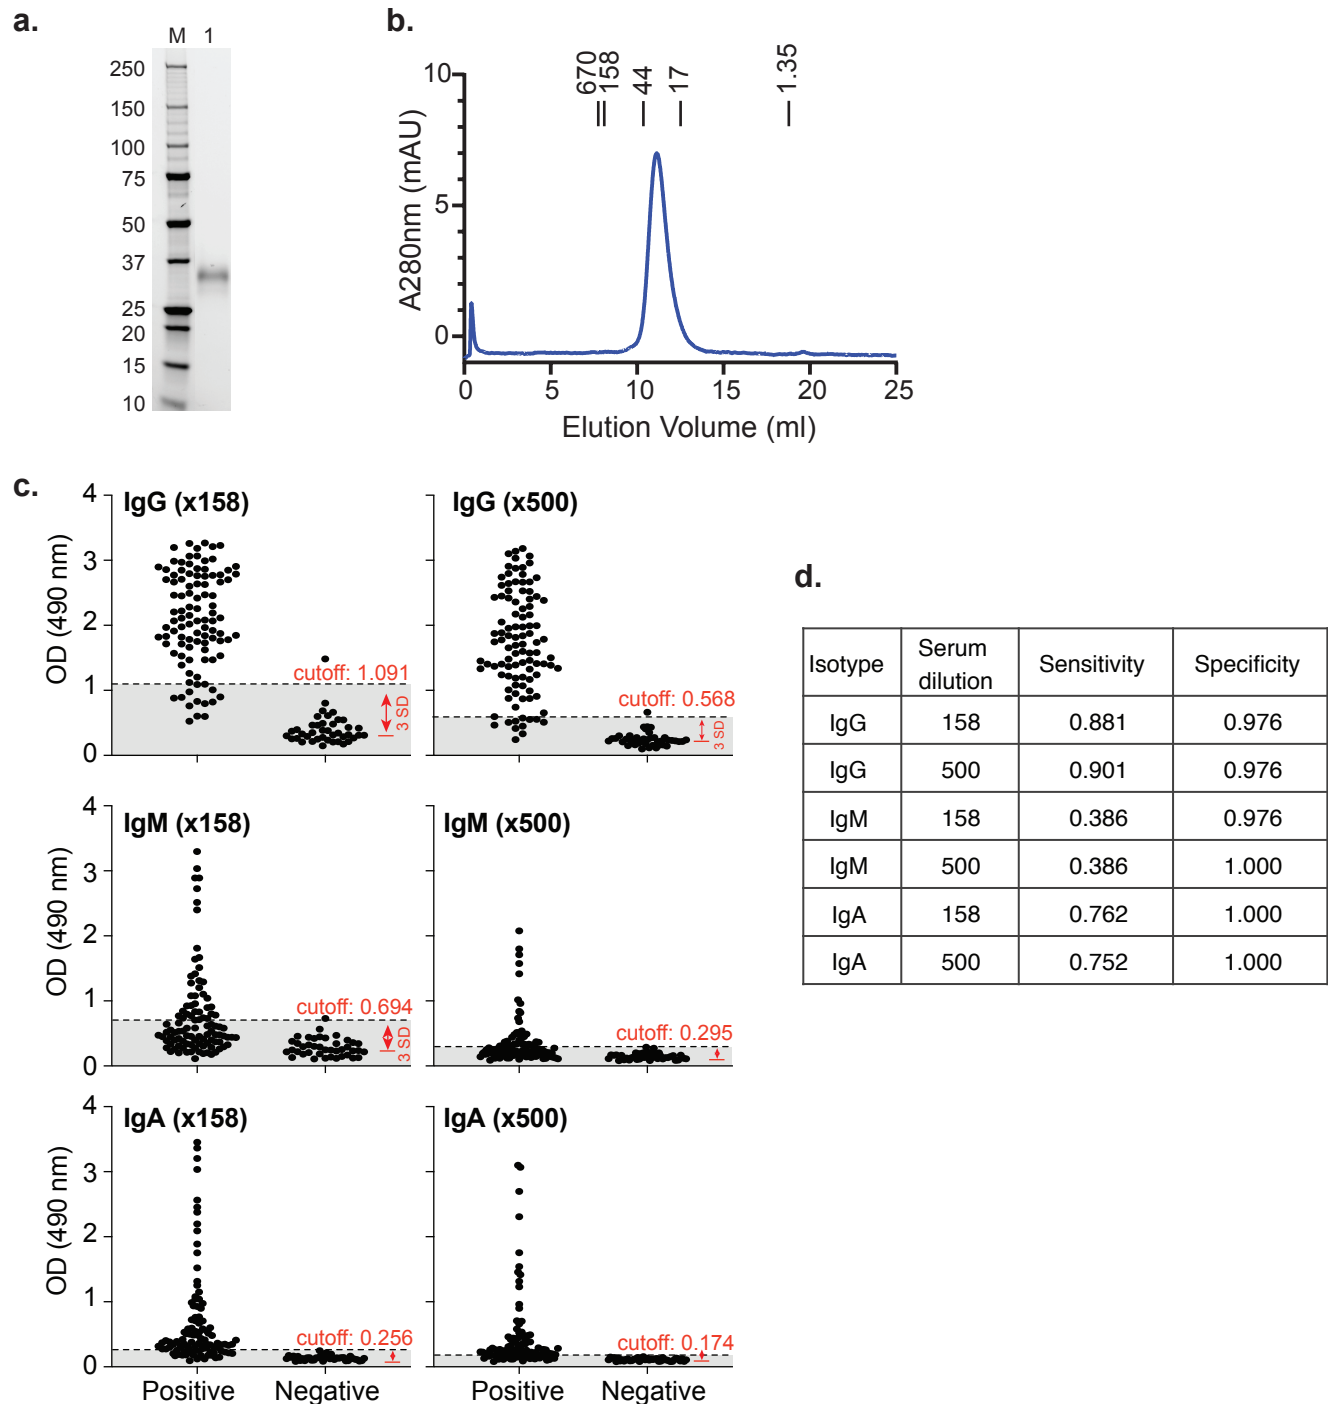

**Extended Data Figure. 1. Production of SARS-CoV-2 Spike RBD antigen and characterization of anti-RBD ELISA.** **a.** SDS-PAGE of purified RBD-His6-Avi-biotin using the Bio-Rad stain-free detection method. Lane M contains standards with its molecular weight in kDa. **b.** Purified RBD-His6-Avi-biotin size-exclusion chromatography on a Superdex 75 10/300 Increase column detected using absorbance at 280 nm. The elution positions of molecular weight standards are marked as bars with their molecular weights in kDa. **c.** Determination of ELISA thresholds. Serum from the 101 SARS-CoV-2 PCR positive were diluted 1/158 and 1/500 and compared with 43 SARS-CoV-2 PCR negative individuals. The cutoff values were defined as the mean plus three times the standard deviation (SD) of the negative control samples as shown by the red arrow. The dashed line indicates the position of each individual cutoff. Cutoff values are indicated in red. **d.** Table showing the sensitivity (% of true positive in positive) and specificity (% of true negative in negative) of each RBD antibody subtype and dilution.

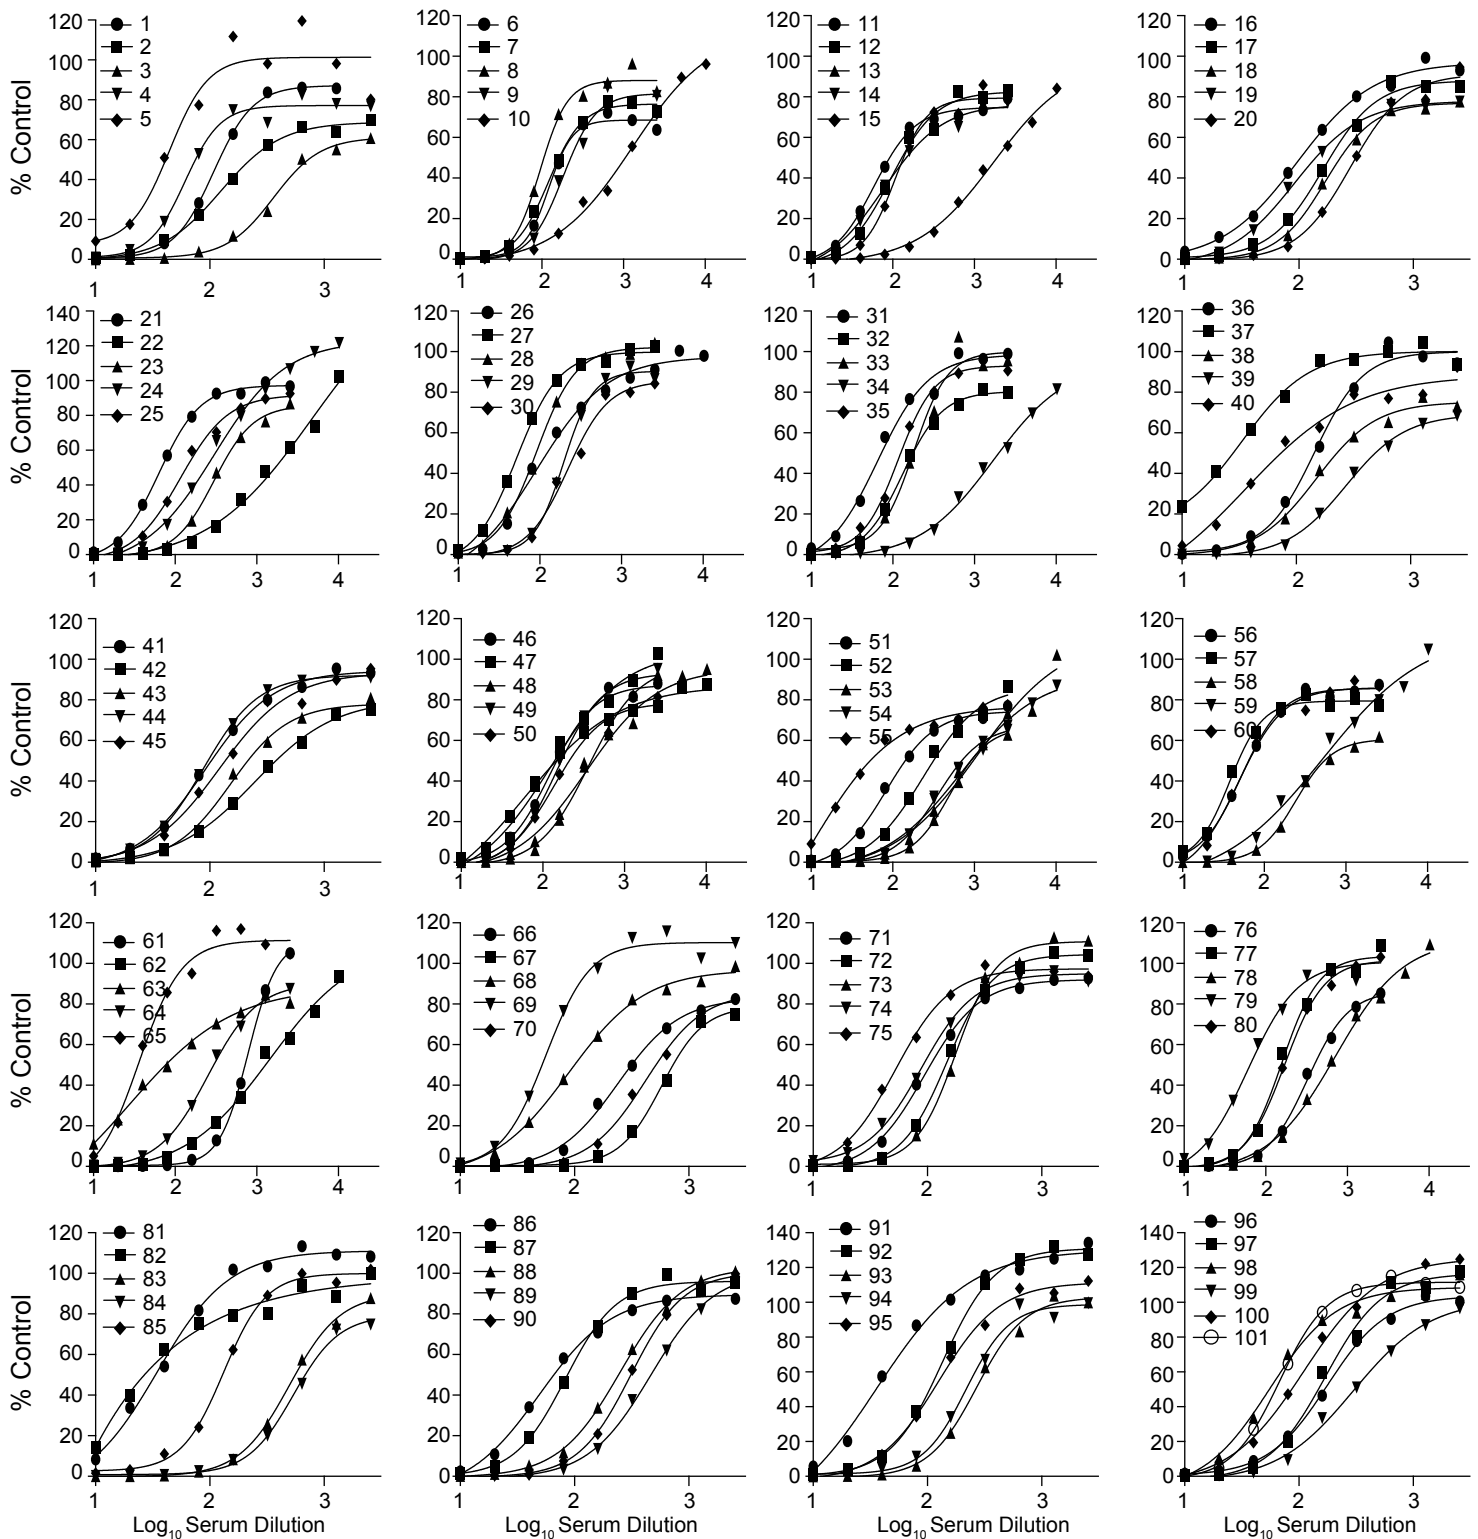

**Extended Data Figure 2. Individual sera neutralization of pseudotyped virus.** Pseudotyped virus was mixed 1:1 with 2-fold dilutions of individual sera and incubated at room temperature for 30 minutes before infecting ACE2-293T cells. Relative infection was determined by luciferase expression 48 hrs post-incubation. Data is represented as the percentage of the untreated control. Data was fitted to a variable slope model log(serum dilution) versus response using Graph Pad prism.

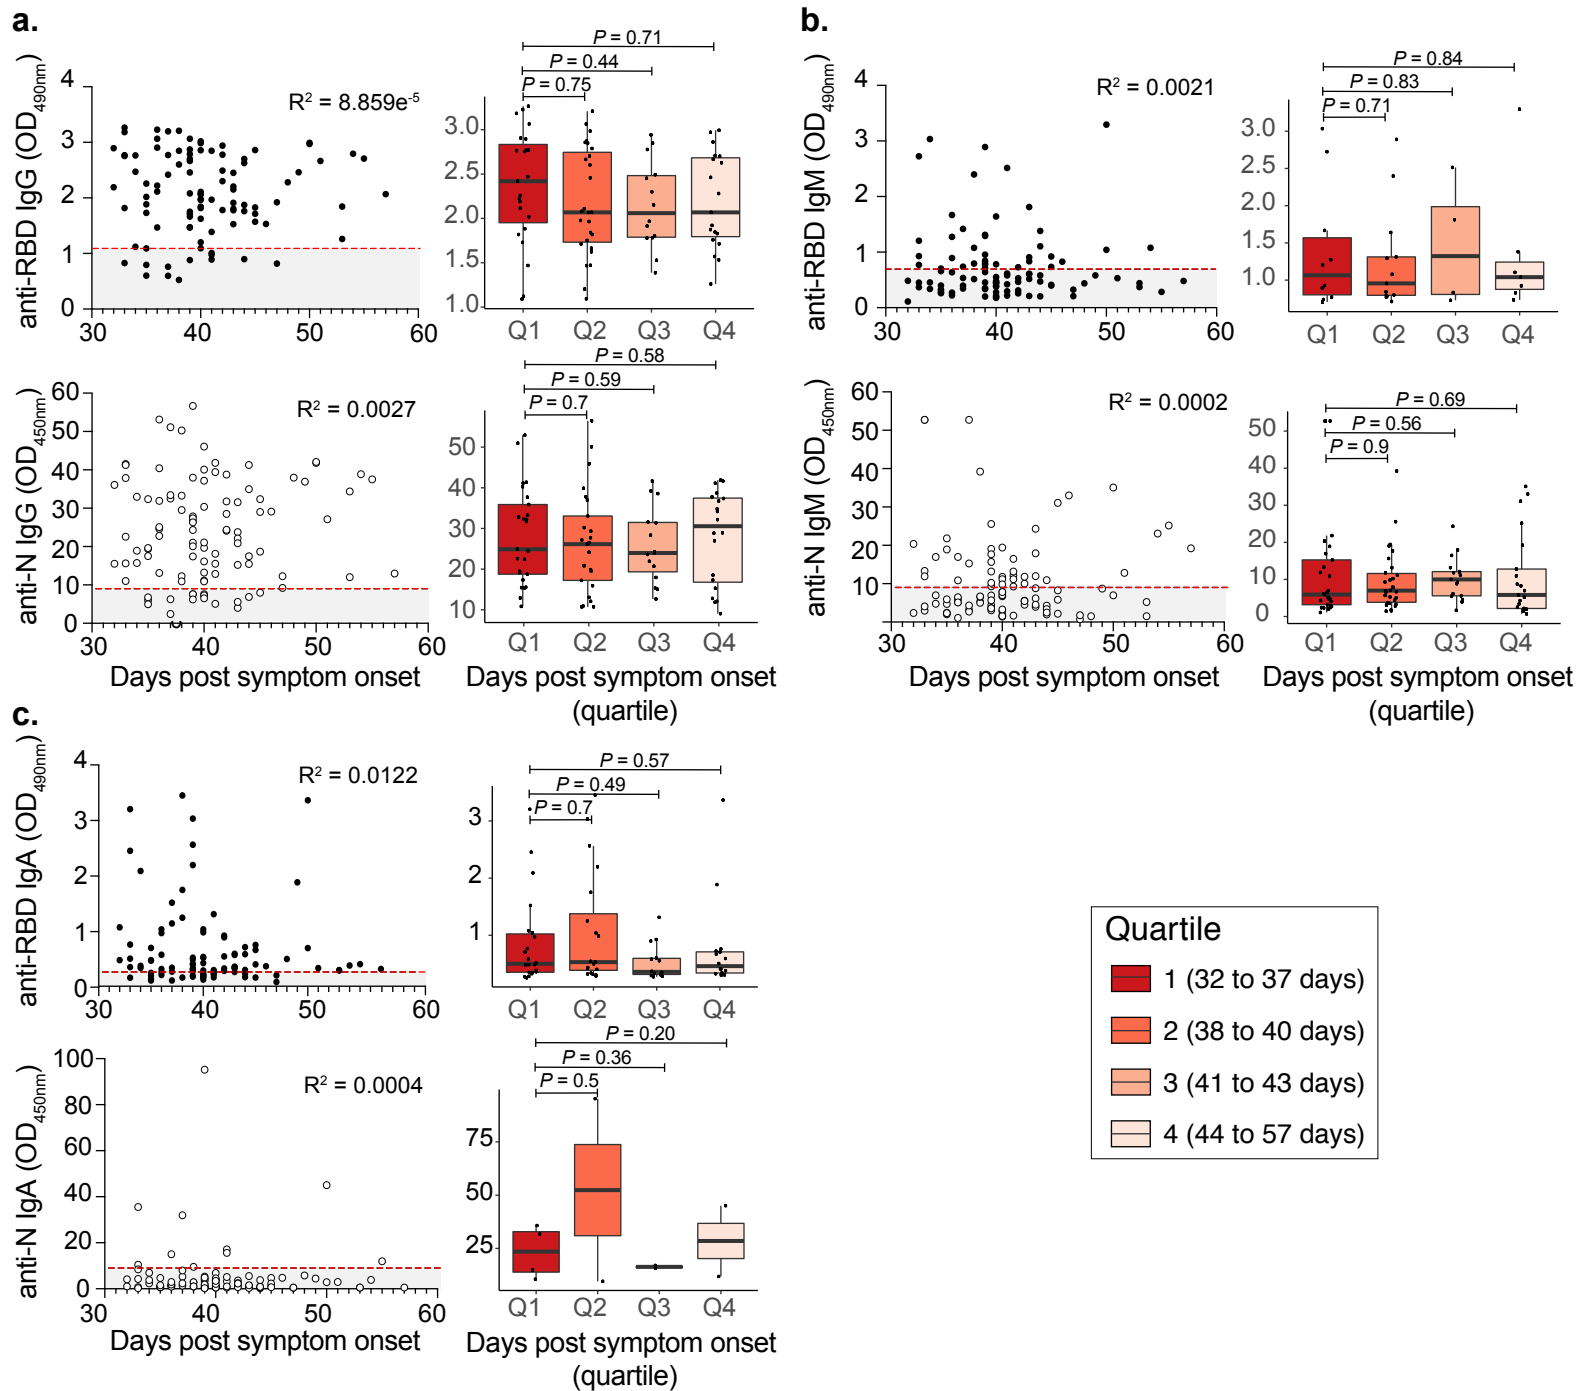

**Extended Data Figure 3. Correlations between isotype composition of SARS-CoV-2 convalescent serum and days post onset of symptoms.** Correlations of anti-RBD (top) or anti-N (bottom) IgG (a), IgM (b) and IgA (c) over days post onset of symptoms are shown. Quartiles were defined based on positive samples (data points > cutoff) for anti-RBD IgG. Each quartile has the following number of observations: anti-RBD IgG (n= 29, 30, 18, 22), anti-N IgG (n= 11, 13, 5, 8), anti-RBD IgM (n= 23, 20, 15, 17), anti-N IgM (n= 11, 12, 10, 8), anti-RBD IgA (n= 24, 28, 15, 20), anti-N IgA (n= 4, 2, 2, 2). P values were calculated using the Wilcoxon rank sum test. The red dashed lines indicate the threshold (anti-N ELISA for -IgG, -IgM or -IgA are OD<sub>450nm</sub> = 9; anti-RBD ELISA for -IgG is OD<sub>490nm</sub> = 1.091; -IgM is OD<sub>490nm</sub> = 0.256 and -IgA is OD<sub>490nm</sub> = 0.694) for each ELISA.

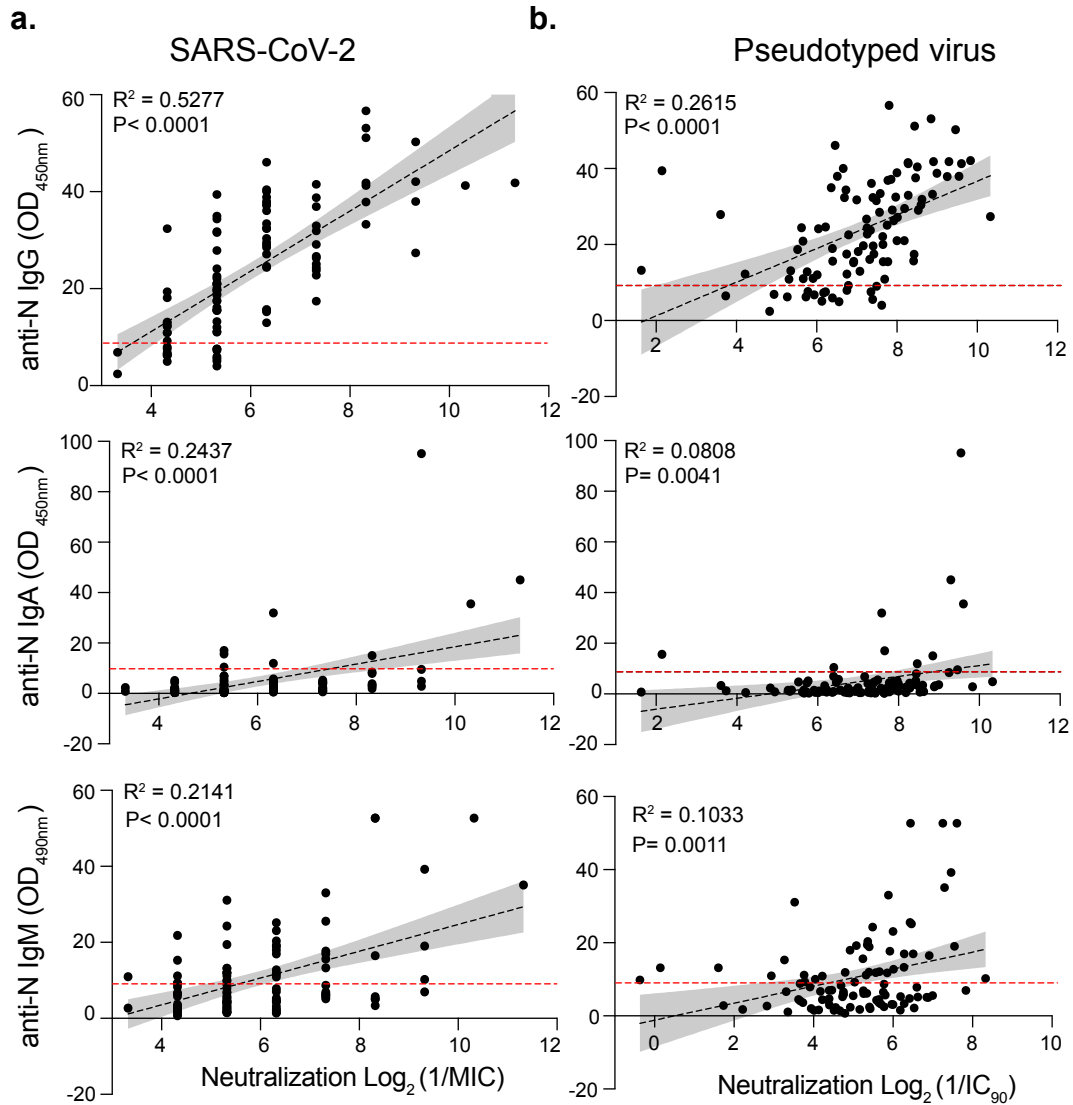

**Extended Data Figure 4. Correlation of anti-N antibody isotypes with viral neutralization.**

Anti-N ELISA correlation for IgG (top), IgA (Middle) and IgM (Bottom) with viral neutralization using authentic SARS-CoV-2 (a) or Pseudotyped virus (b). Correlation and linear regression analyses were performed using GraphPad Prism 8. P values were calculated using a two-sided F-test. The red dashed lines indicate the threshold (anti-RBD ELISA for -IgG; -IgM and -IgA is OD<sub>450nm</sub> > 9) for each ELISA.
